# Supplementary material for: [3+2] Cycloaddition of Tosylmethyl Isocyanide with Styrylisoxazoles: Facile Access to Polysubstituted 3-(Isoxazol-5-yl)pyrroles
Source: MDPI journal article supplement (doi:10.3390/molecules22071131), 2017-07-07
Supplement: s1 [file s1]

# Supporting Information

## [3+2] Cycloaddition of Tosylmethyl Isocyanide with Styrylisoxazoles: Facile Access to Polysubstituted 3-(Isoxazol-5-yl)pyrroles

Xueming Zhang<sup>1</sup>, Xianxiu Xu<sup>2</sup> and Dawei Zhang<sup>1,\*</sup>

<sup>1</sup> College of Chemistry, Jilin University, Changchun 130012, China;

<sup>2</sup> College of Chemistry, Chemical Engineering and Materials Science, Key Laboratory of  
Molecular and Nano Probes, Ministry of Education, Shandong Normal University, Jinan  
250014, China;

\* Correspondence: z\_dw@jlu.edu.cn; Tel.: +86-431-878-36471

### Contents

|                                                                                                   |     |
|---------------------------------------------------------------------------------------------------|-----|
| I. Copies of <sup>1</sup> H NMR and <sup>13</sup> C NMR spectra of compounds <b>3aa-3fb</b> ..... | S2  |
| II. Copies of NOE-NMR spectra of compounds <b>3aq</b> .....                                       | S24 |
| III. Crystal data and structural refinement for <b>3ac</b> .....                                  | S25 |

I. Copies of  $^1\text{H}$  NMR and  $^{13}\text{C}$  NMR spectra of compounds **3aa-3fb**

$^1\text{H}$  NMR and  $^{13}\text{C}$  NMR of **3aa**

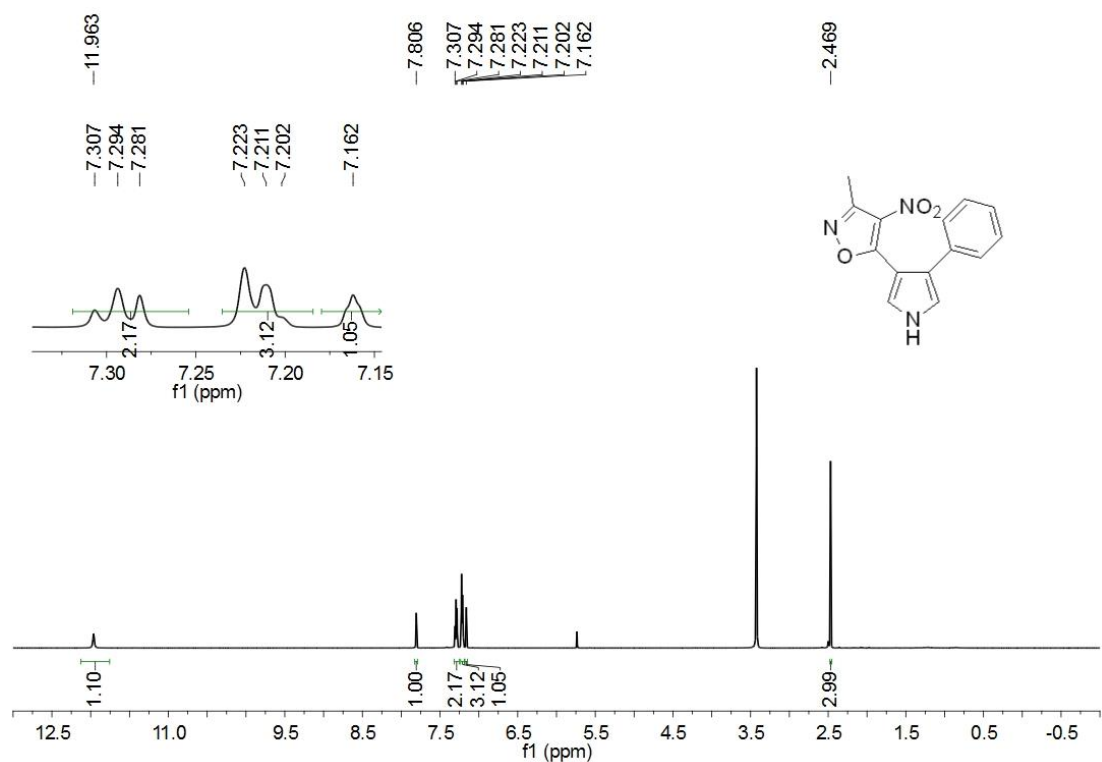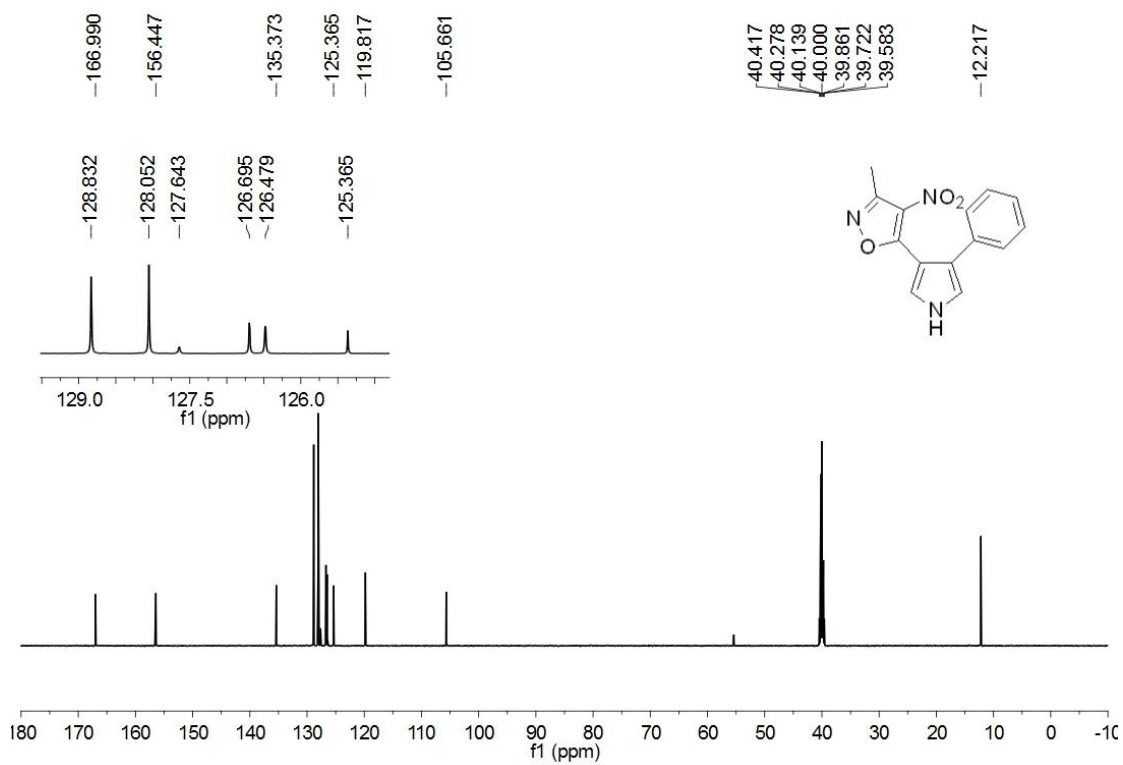

$^1\text{H}$  NMR and  $^{13}\text{C}$  NMR of **3ab**

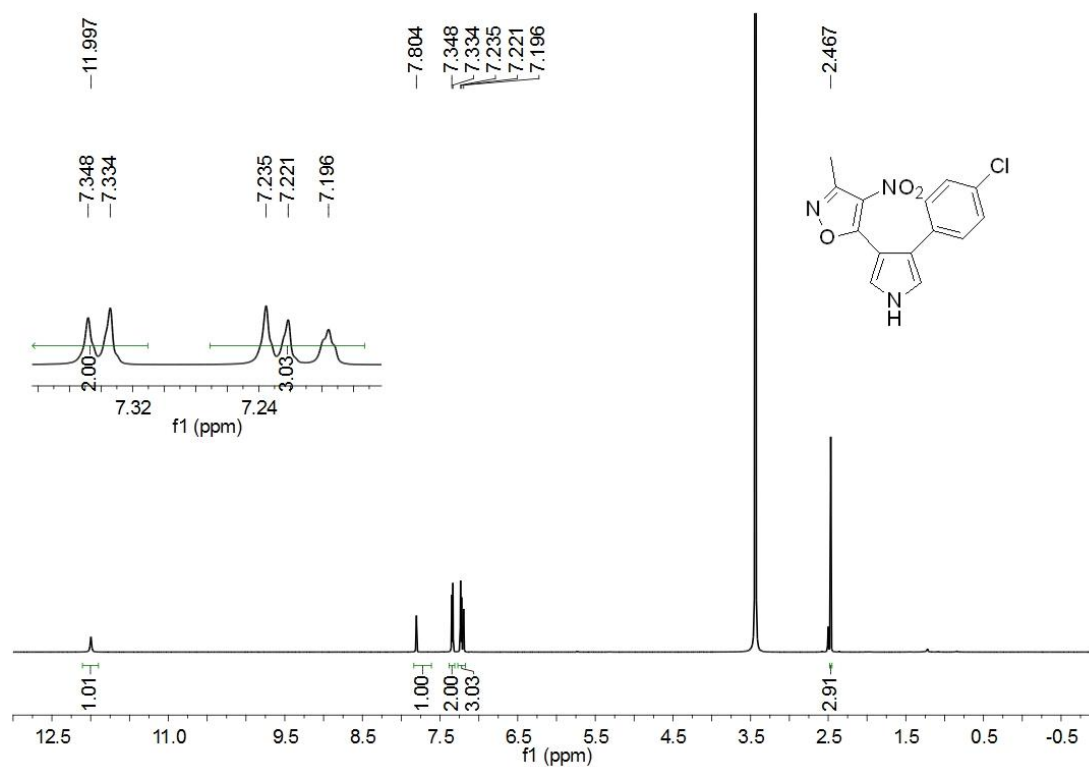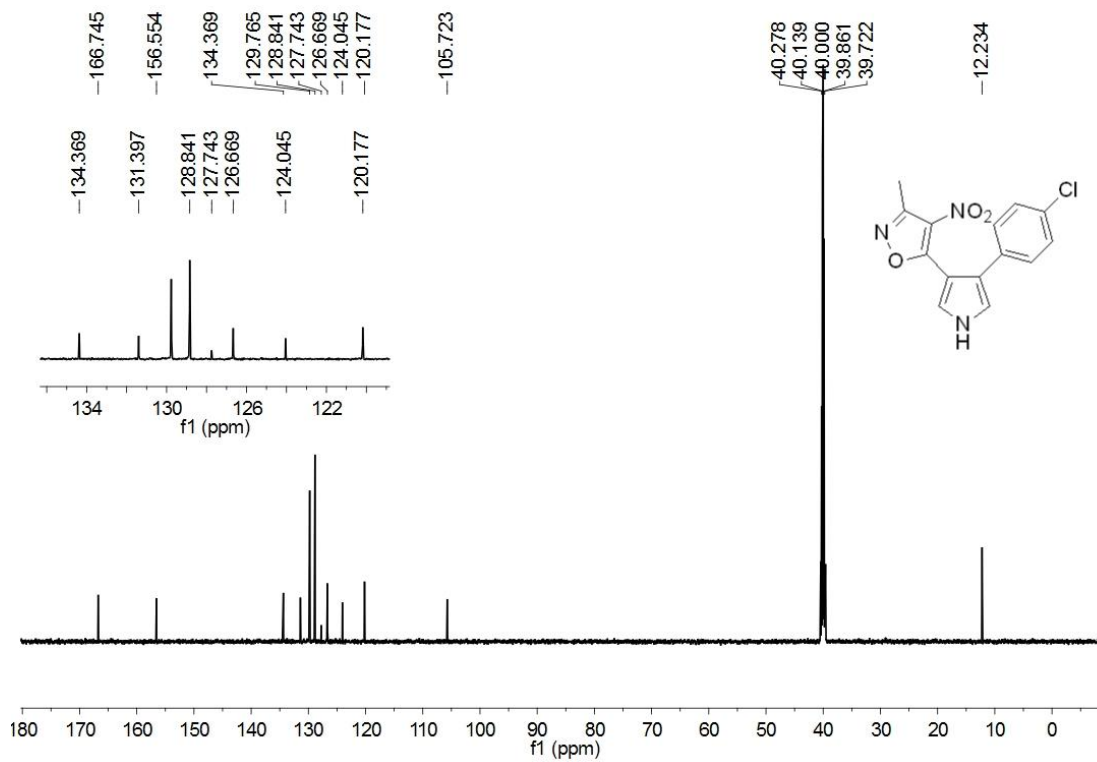

$^1\text{H}$  NMR and  $^{13}\text{C}$  NMR of **3ac**

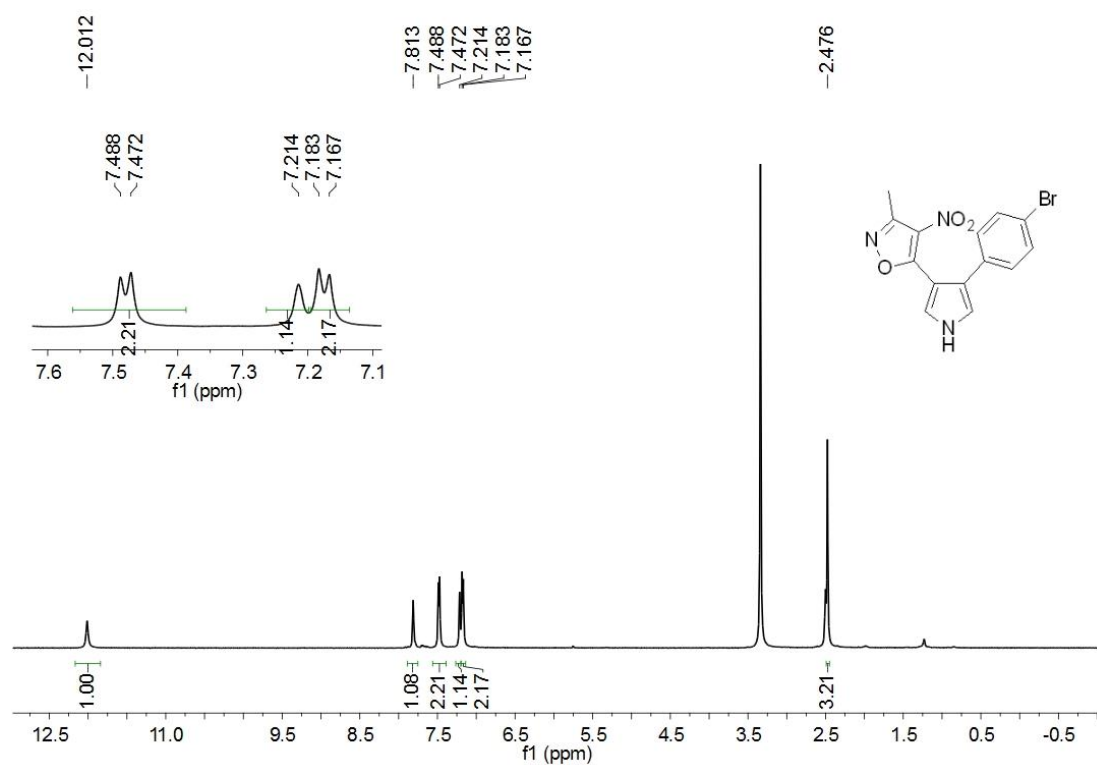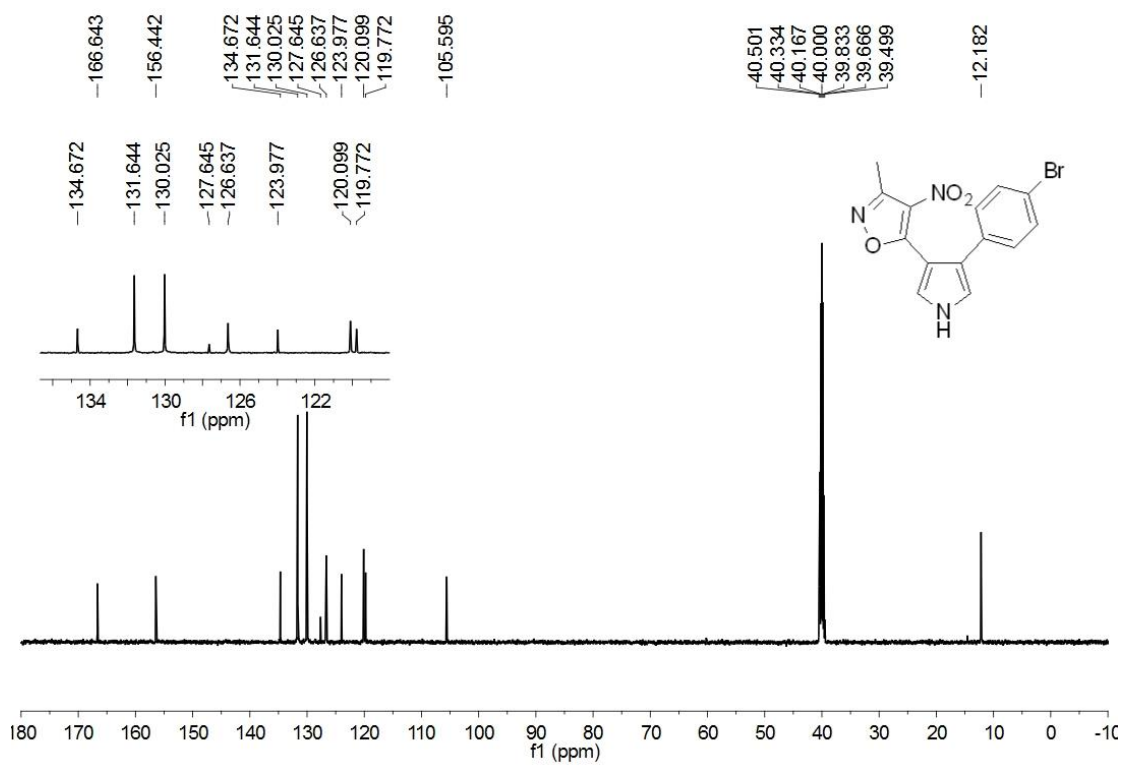

$^1\text{H}$  NMR and  $^{13}\text{C}$  NMR of **3ad**

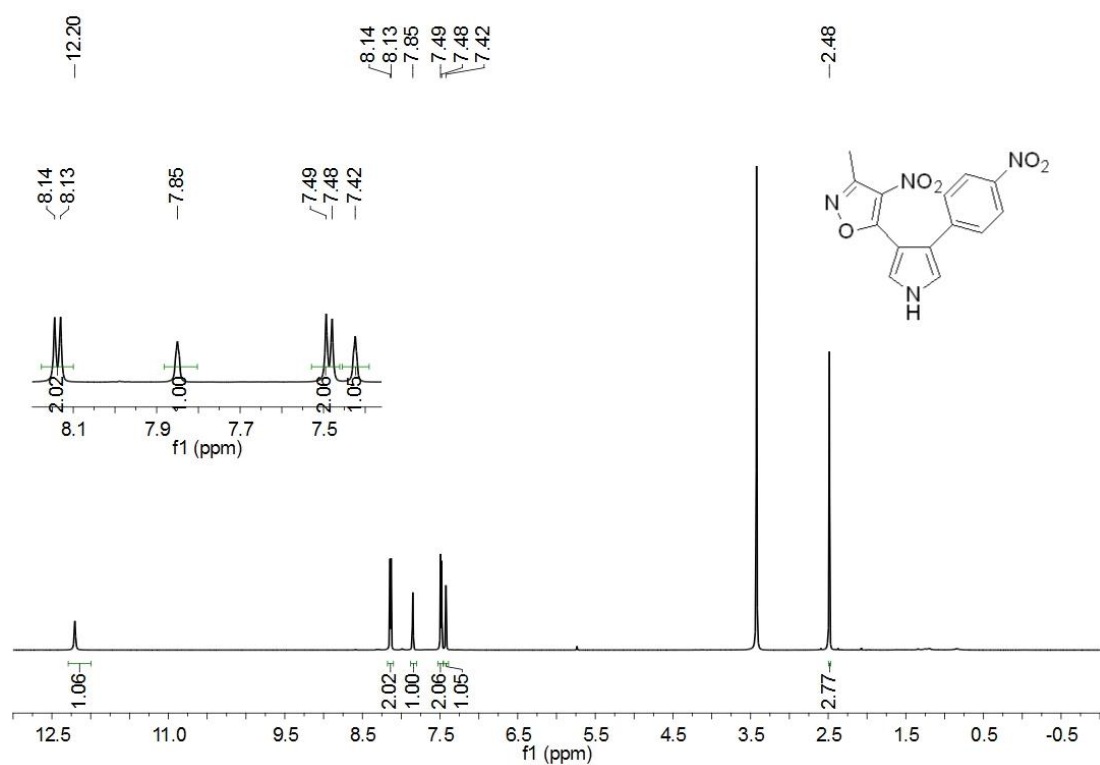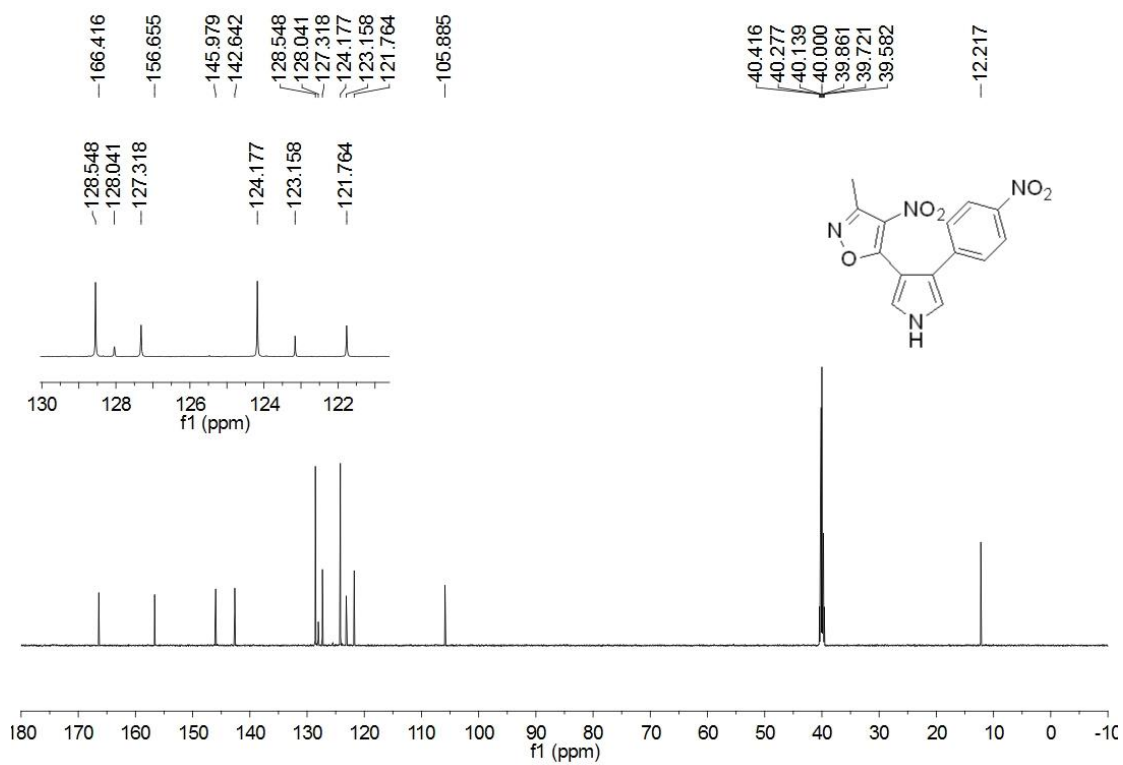

$^1\text{H}$  NMR and  $^{13}\text{C}$  NMR of **3ae**

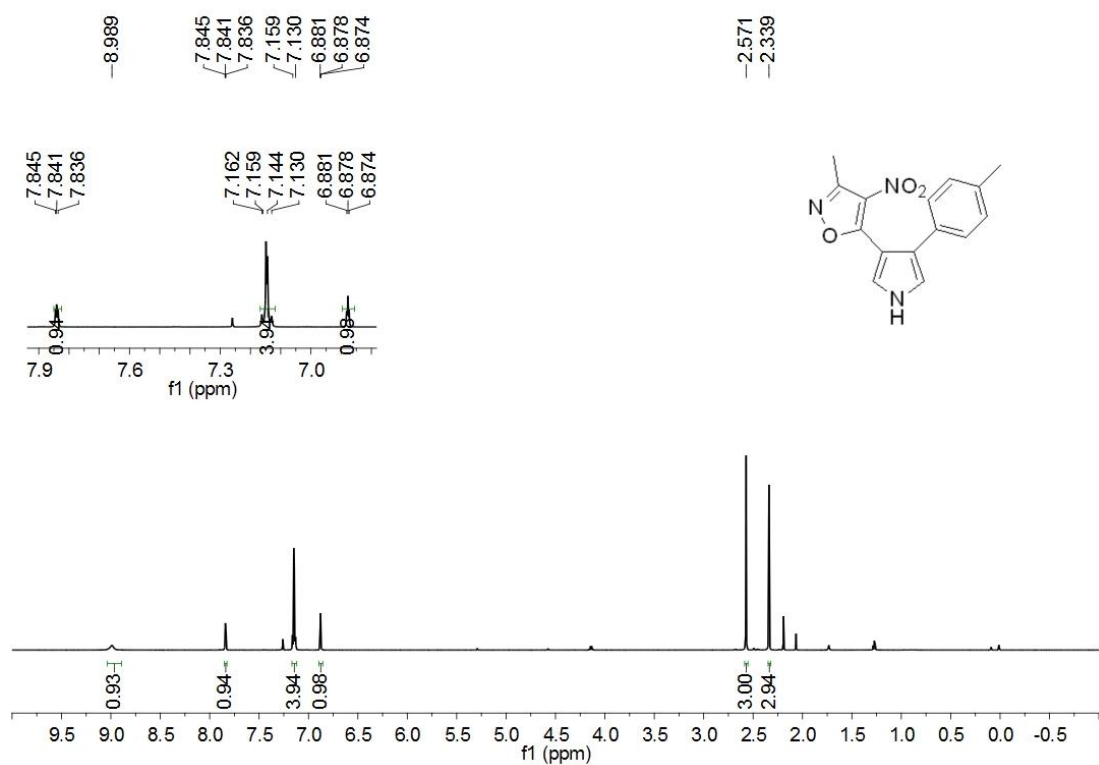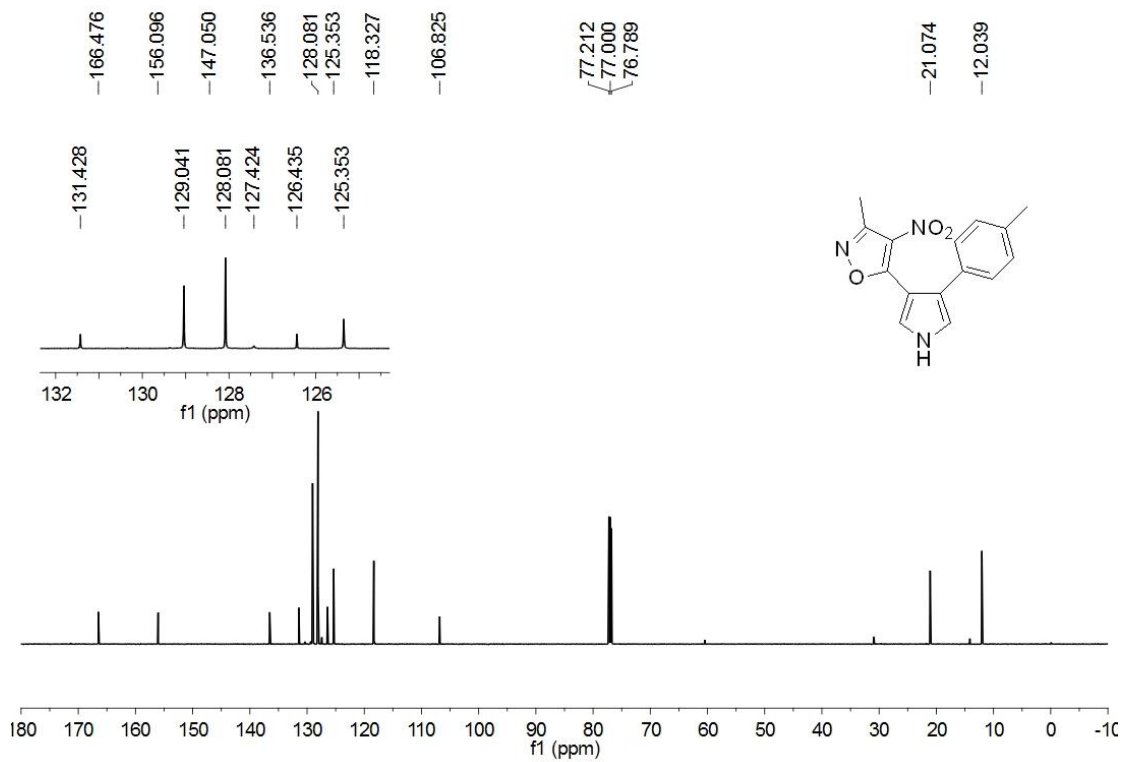

$^1\text{H}$  NMR and  $^{13}\text{C}$  NMR of **3af**

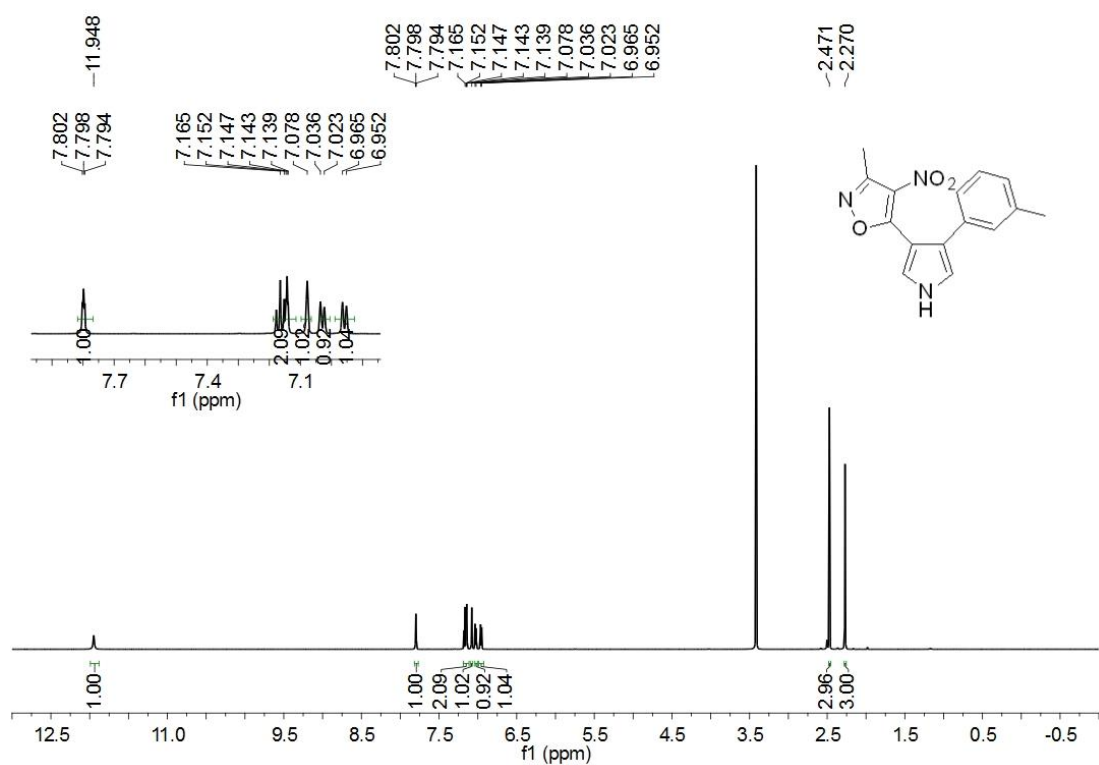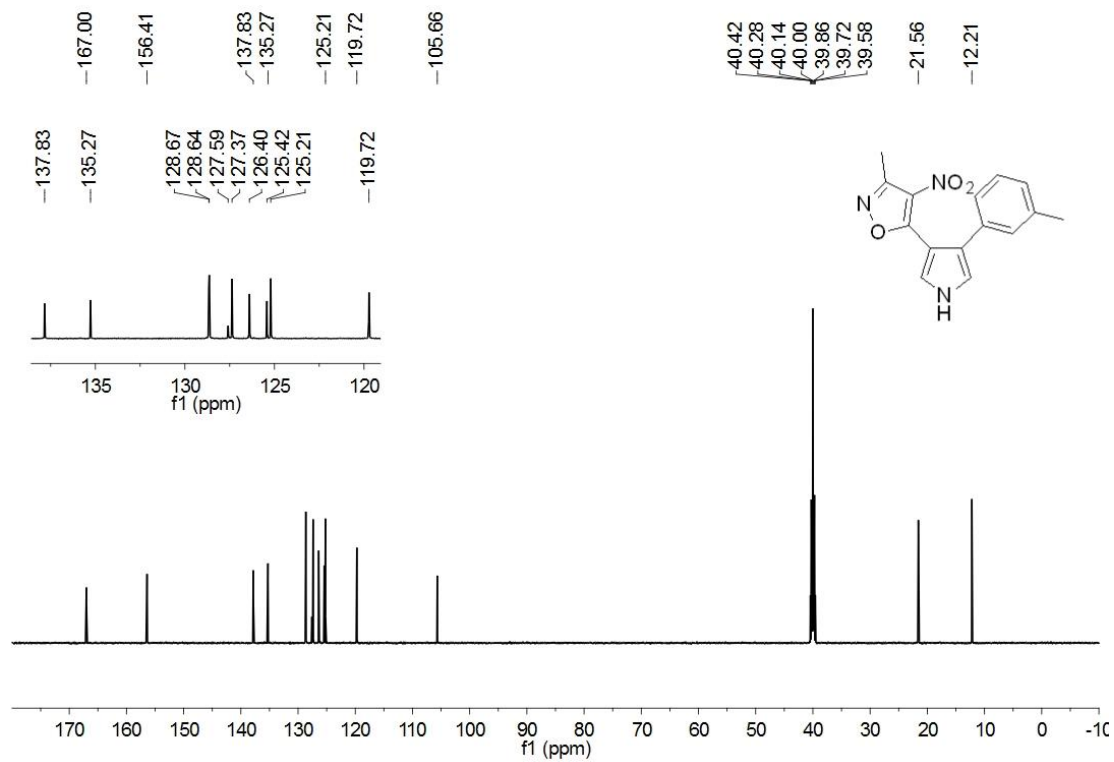

$^1\text{H}$  NMR and  $^{13}\text{C}$  NMR of **3ag**

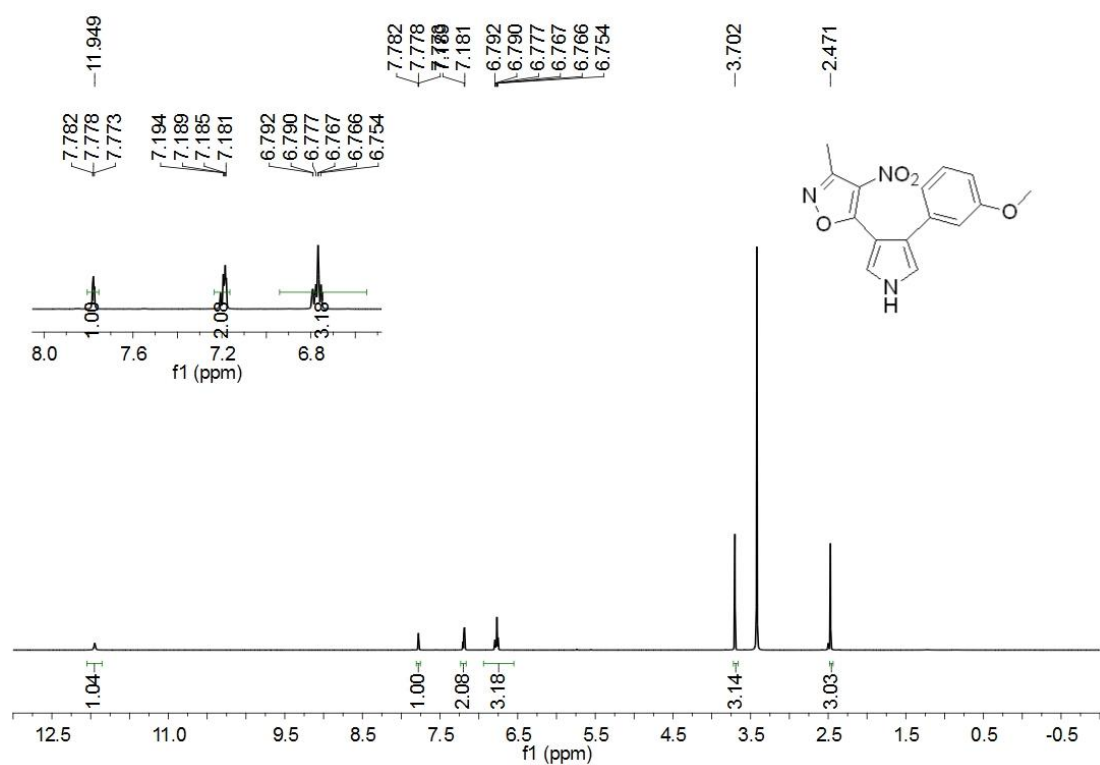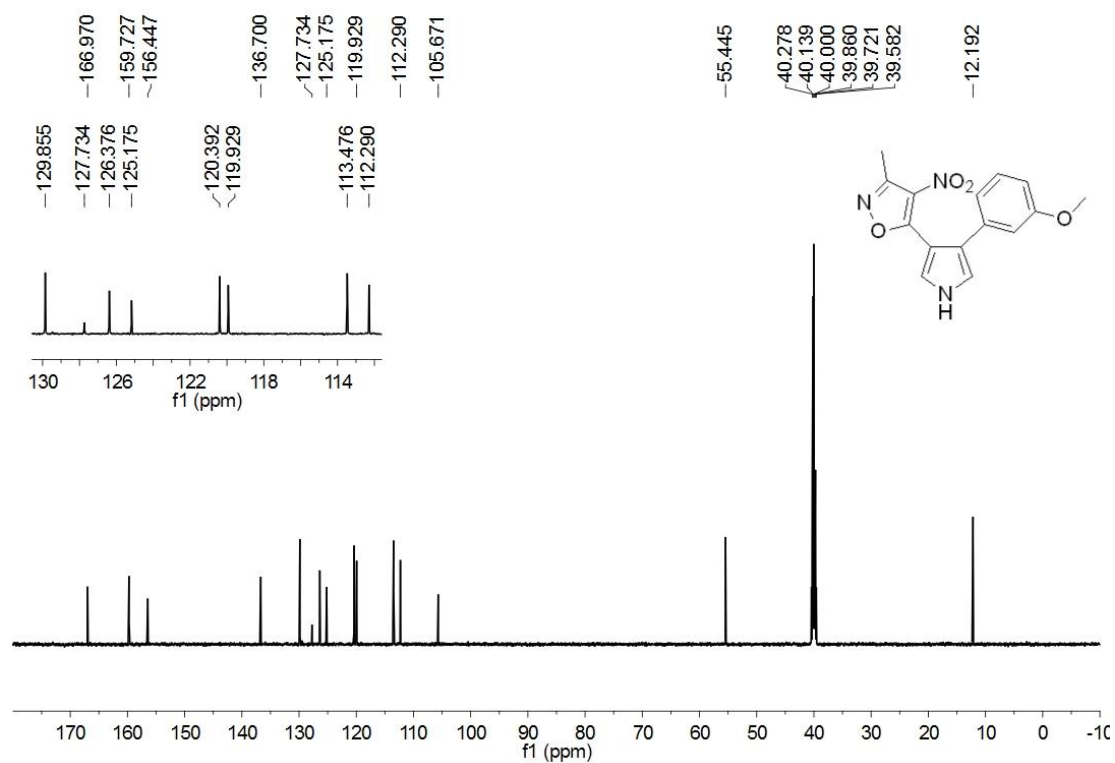



$^1\text{H}$  NMR and  $^{13}\text{C}$  NMR of **3ah**

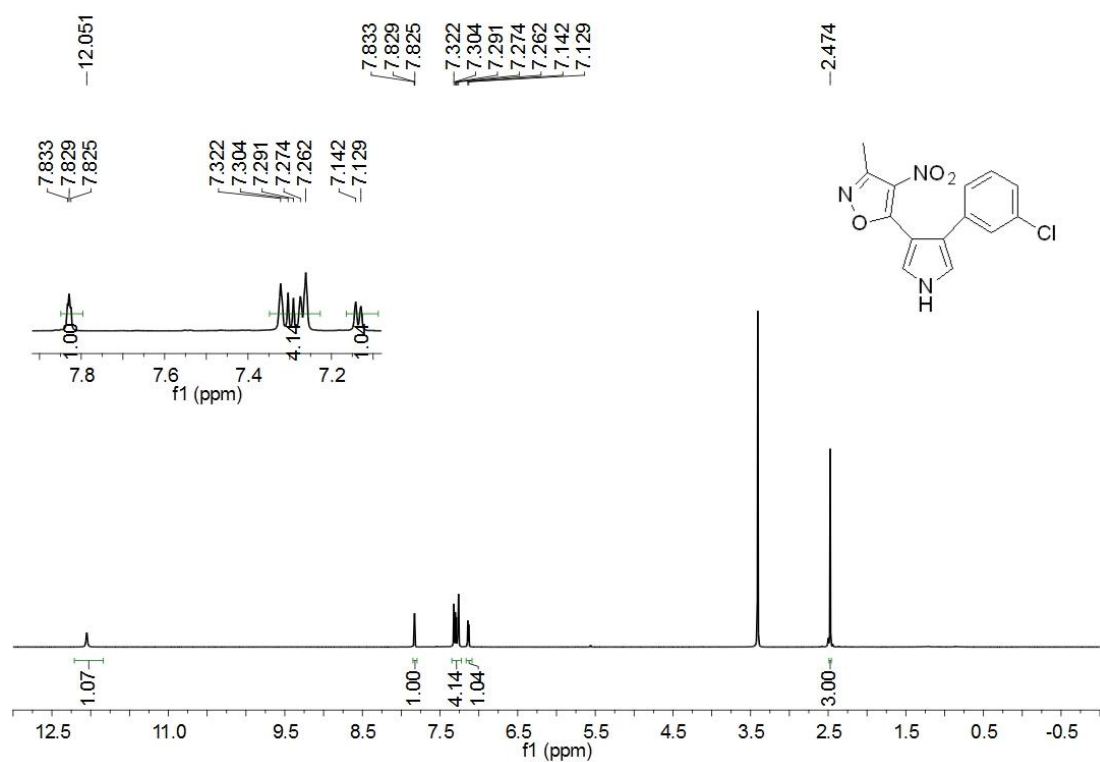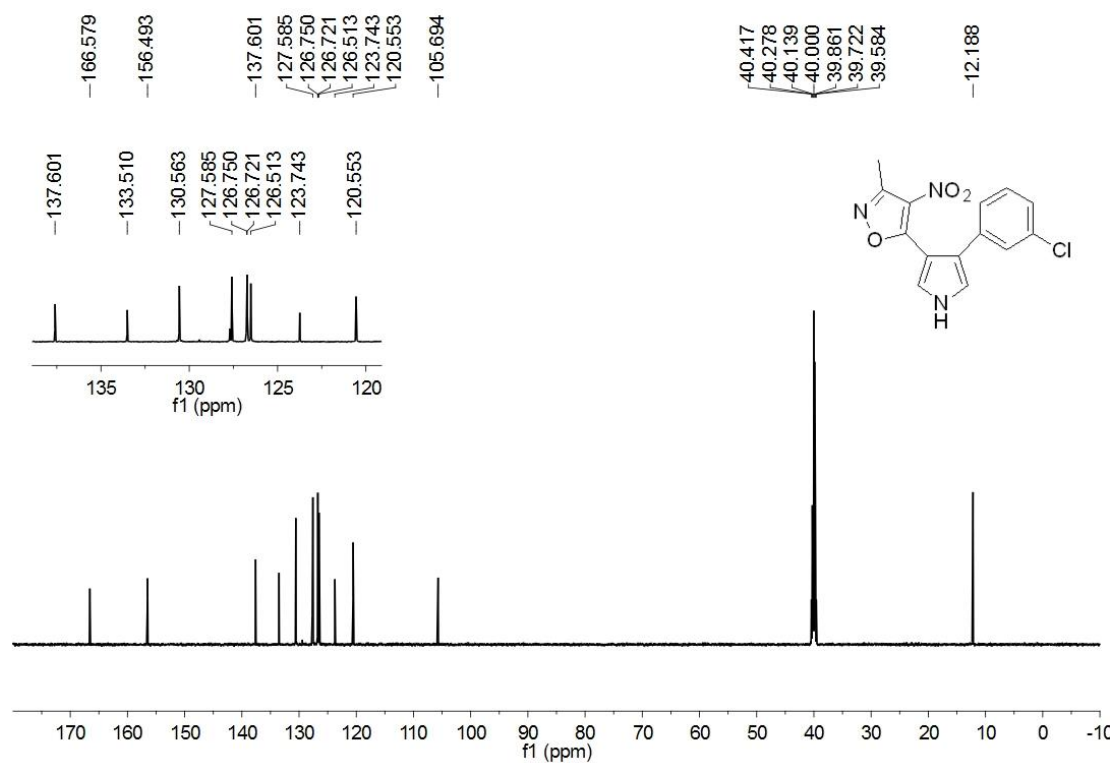

$^1\text{H}$  NMR and  $^{13}\text{C}$  NMR of **3ai**

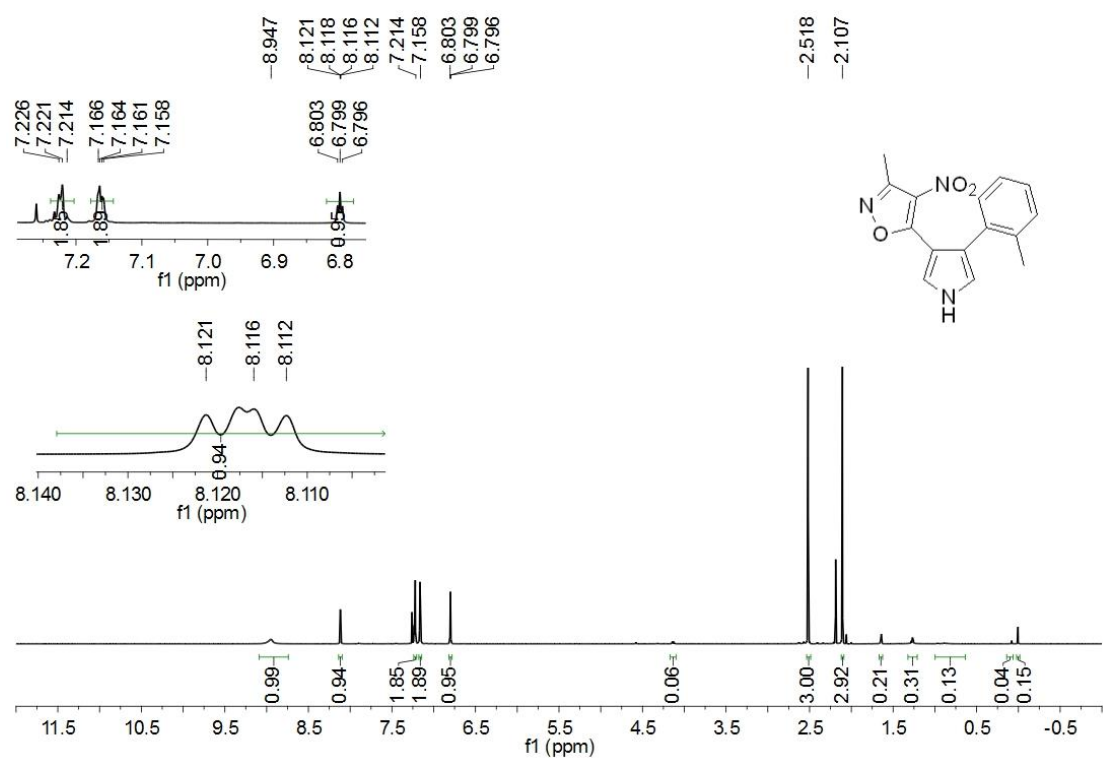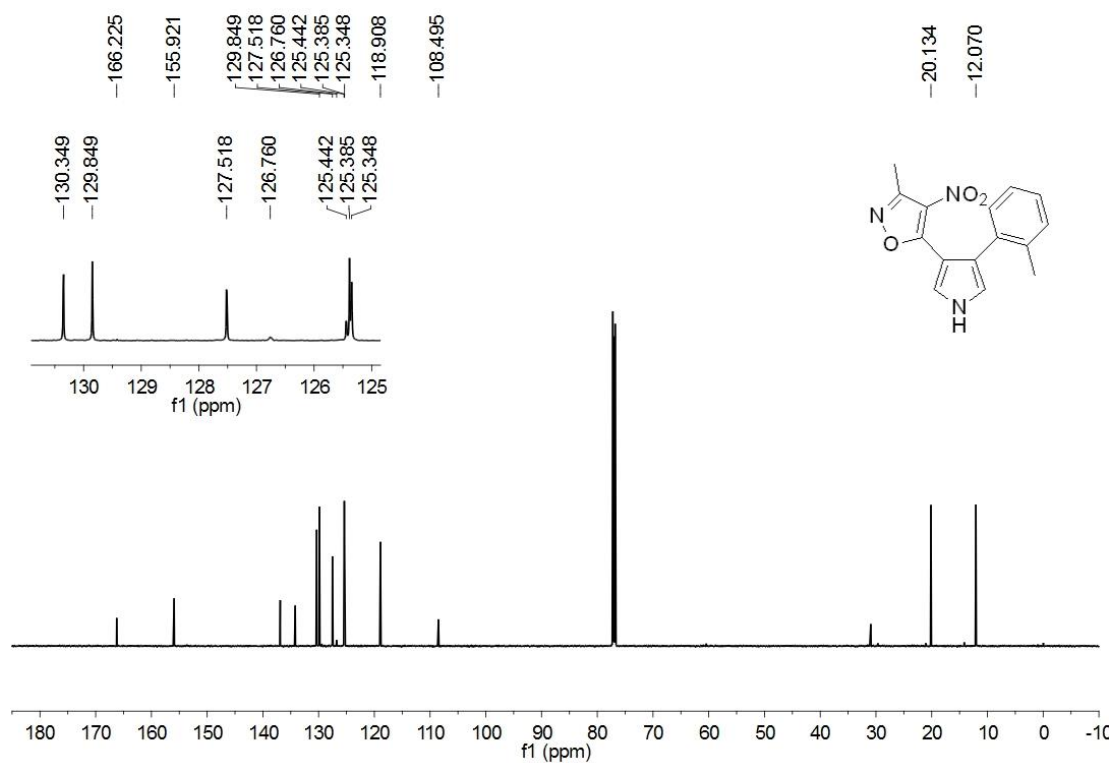

$^1\text{H}$  NMR and  $^{13}\text{C}$  NMR of **3aj**

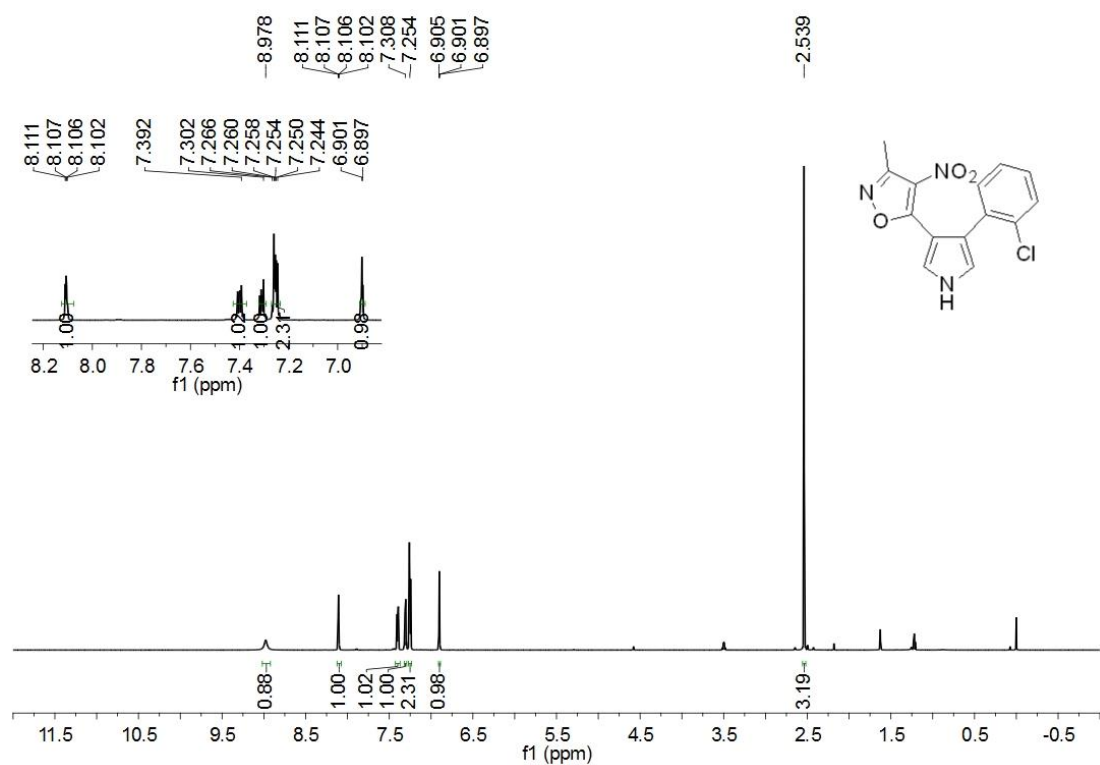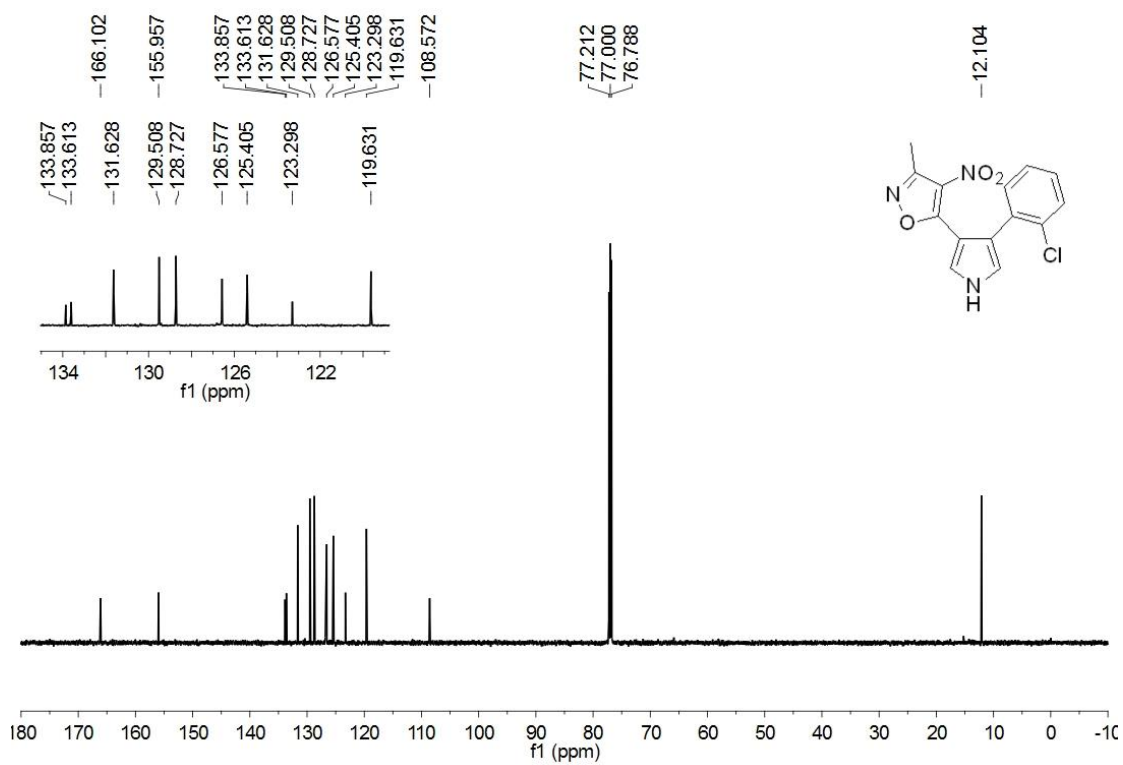

$^1\text{H}$  NMR and  $^{13}\text{C}$  NMR of **3ak**

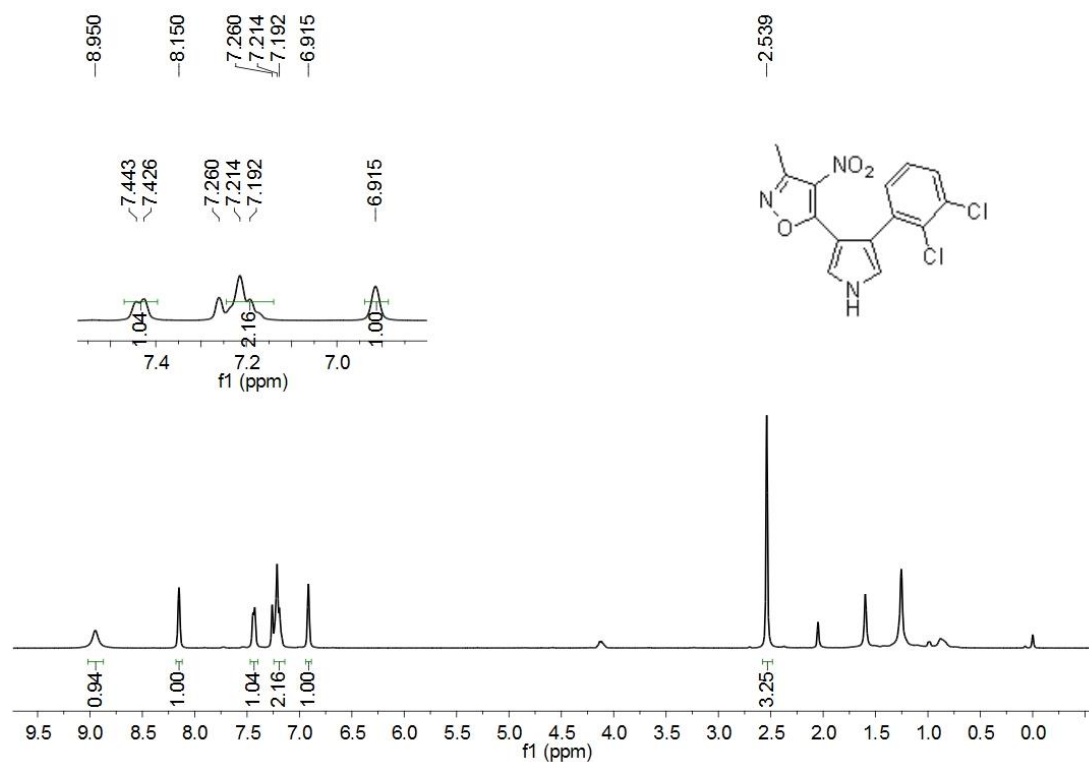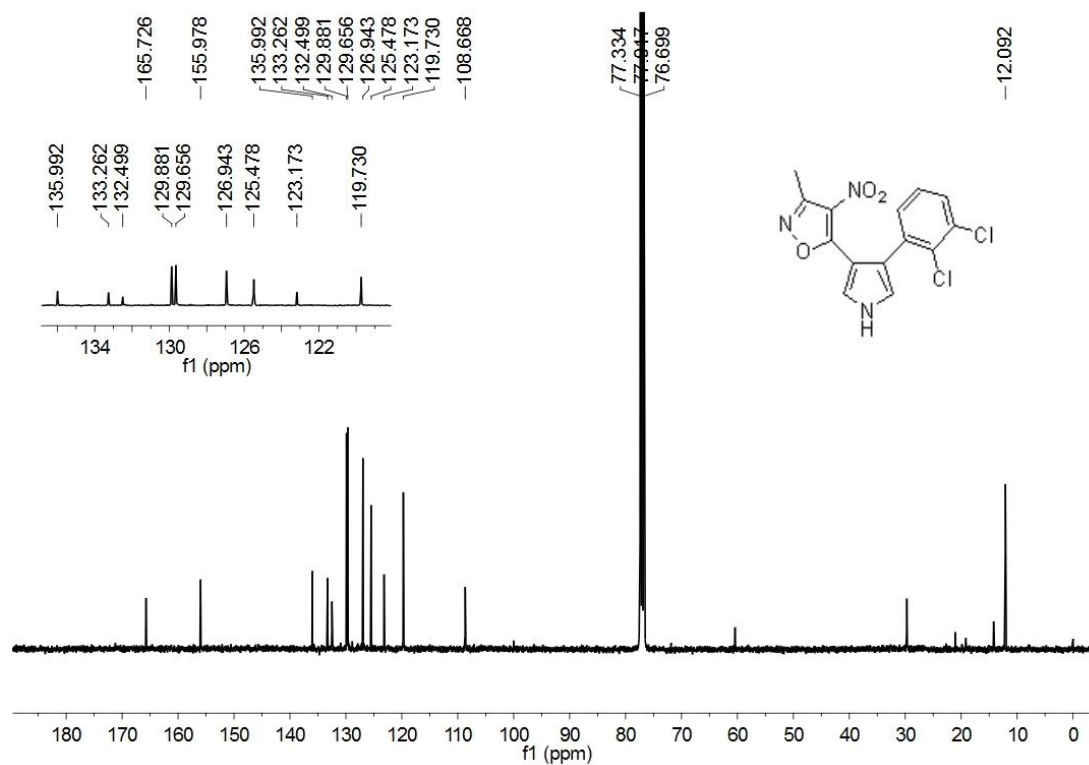

$^1\text{H}$  NMR and  $^{13}\text{C}$  NMR of **3al**

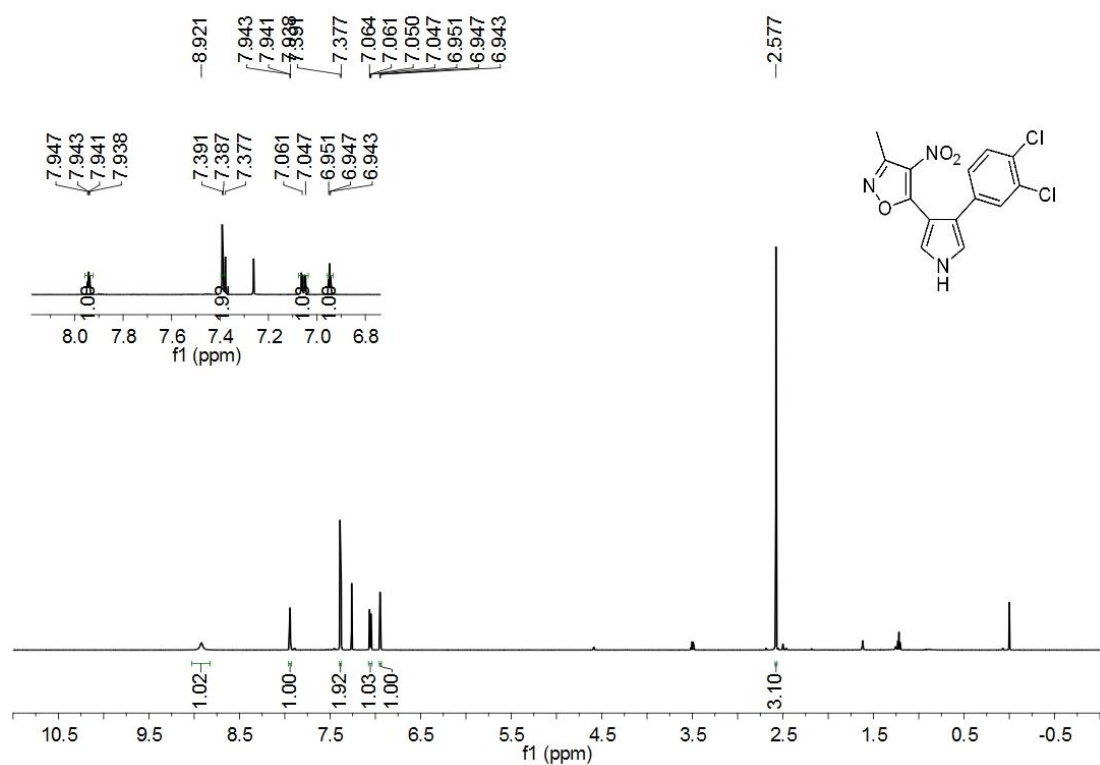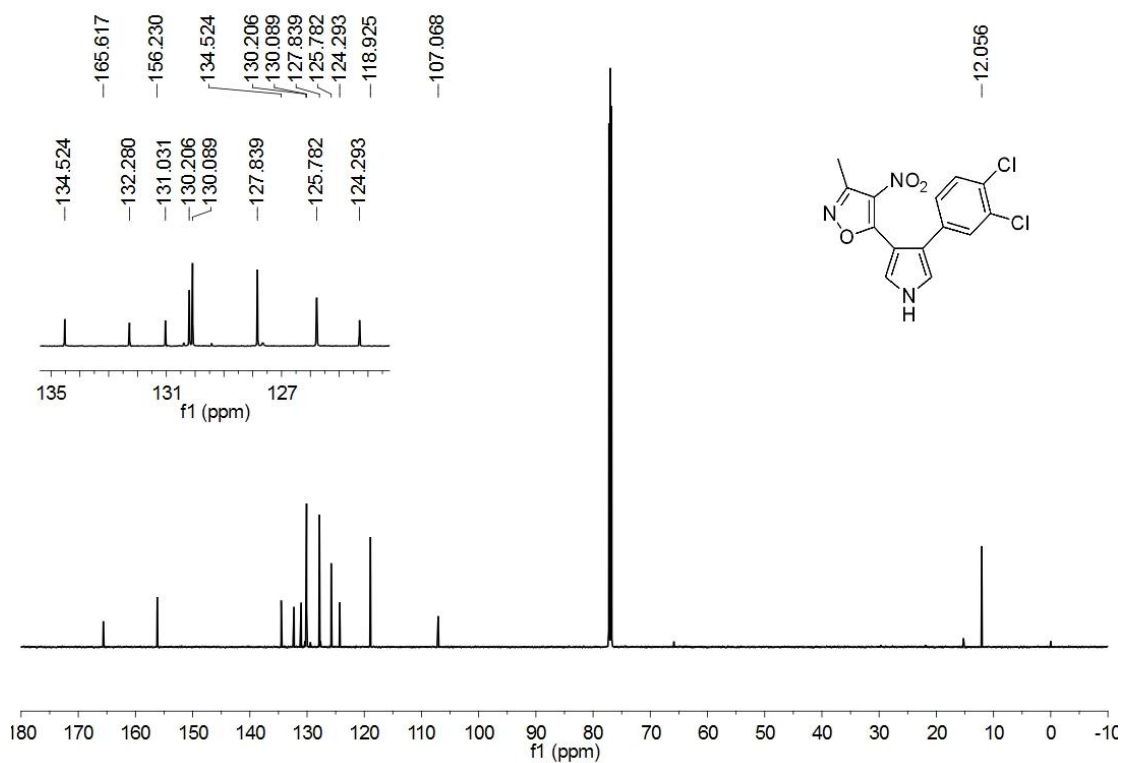

$^1\text{H}$  NMR and  $^{13}\text{C}$  NMR of **3am**

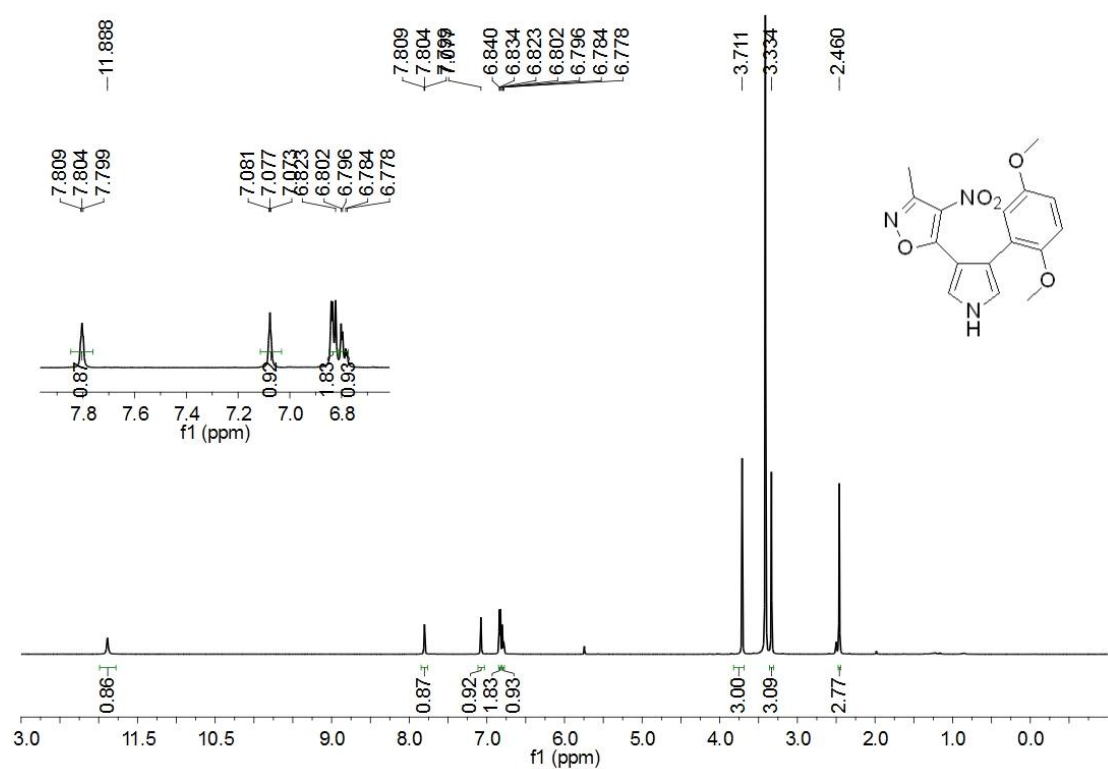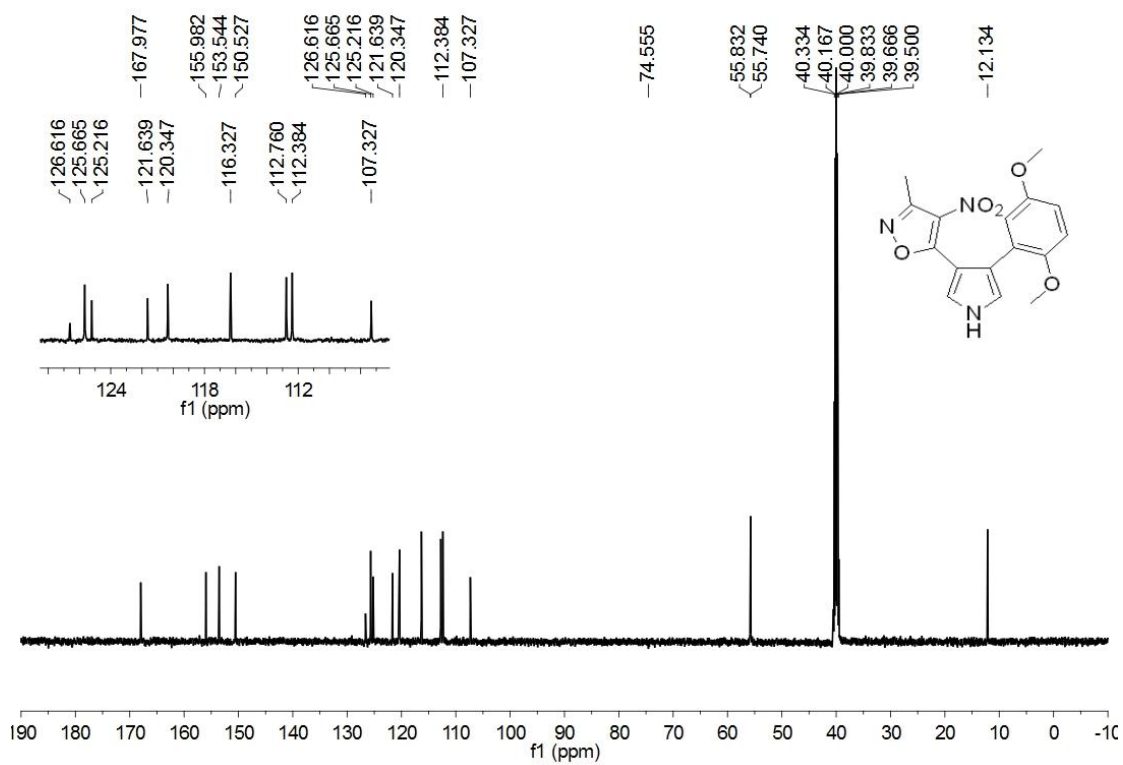

$^1\text{H}$  NMR and  $^{13}\text{C}$  NMR of **3an**

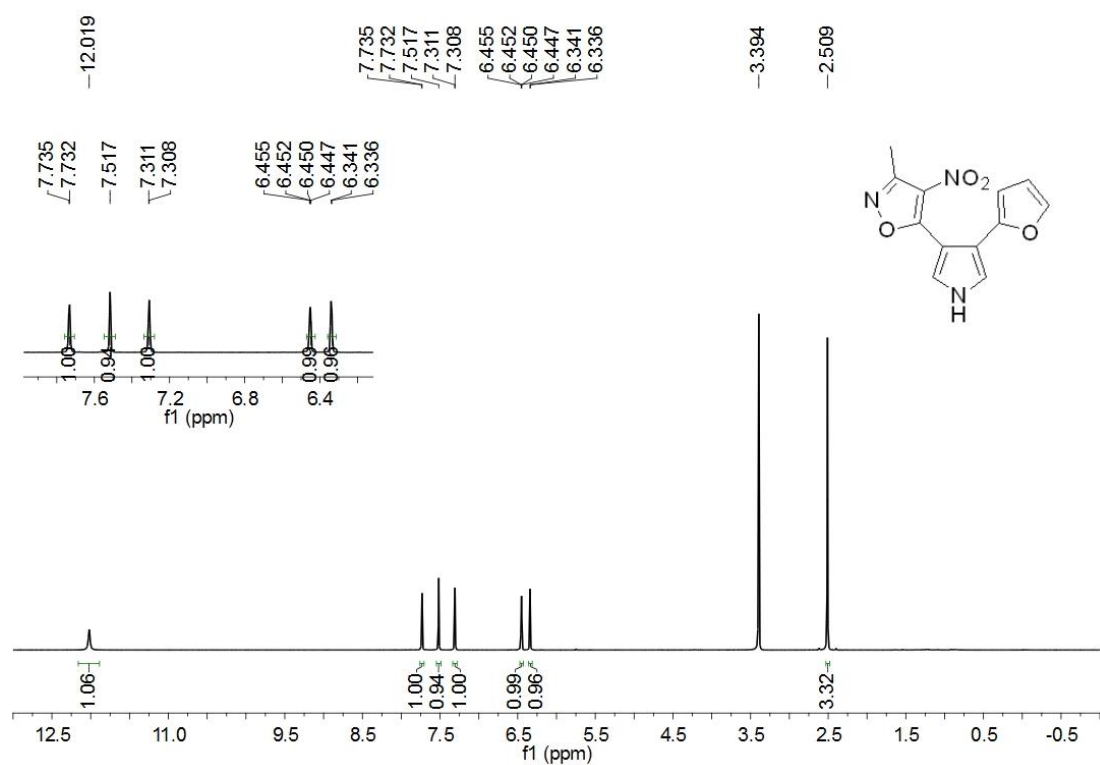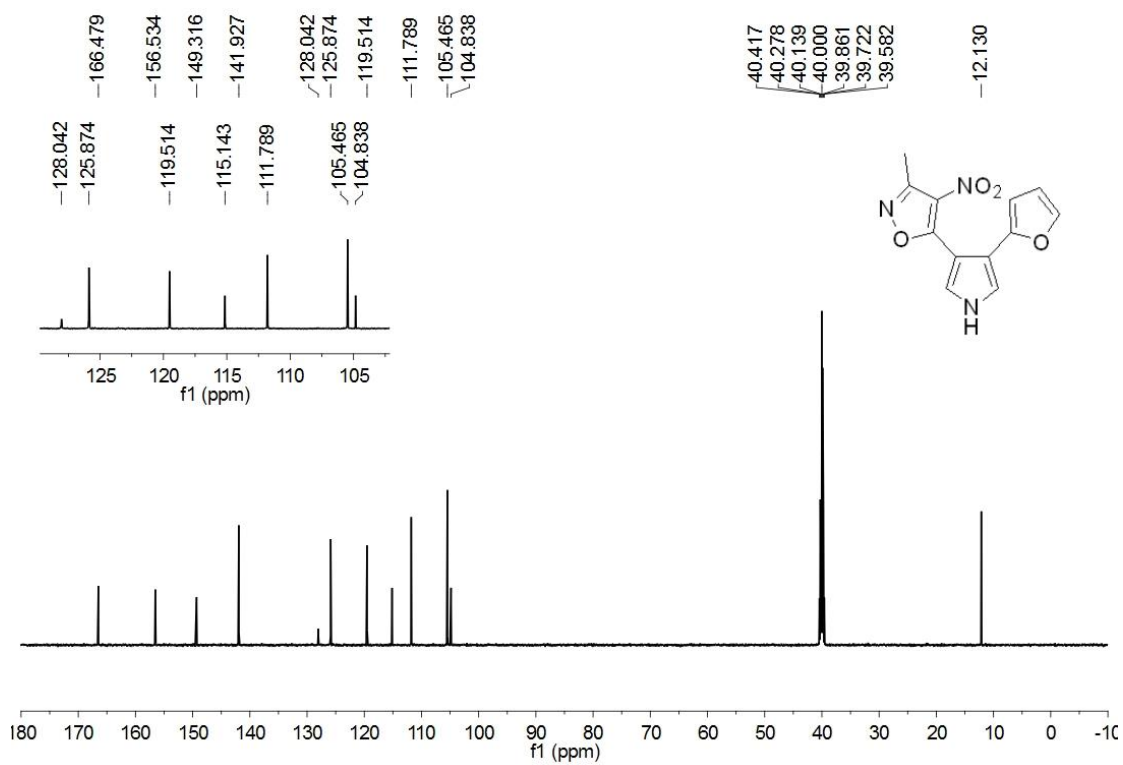

$^1\text{H}$  NMR and  $^{13}\text{C}$  NMR of **3ao**

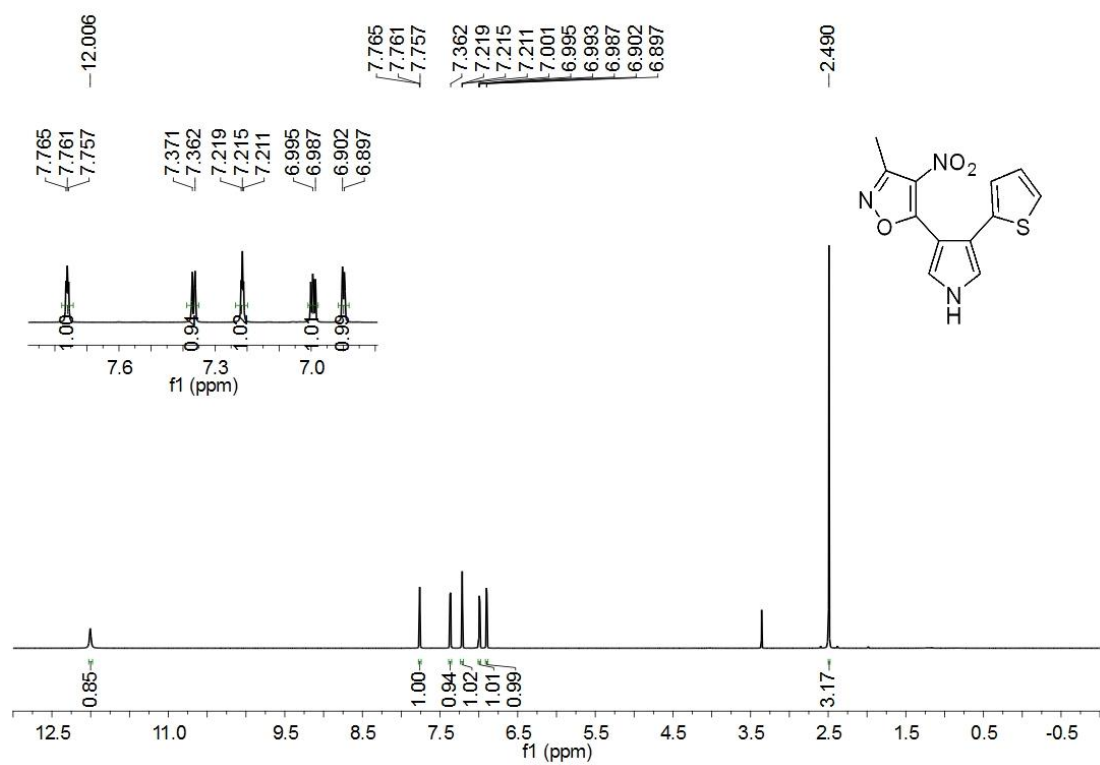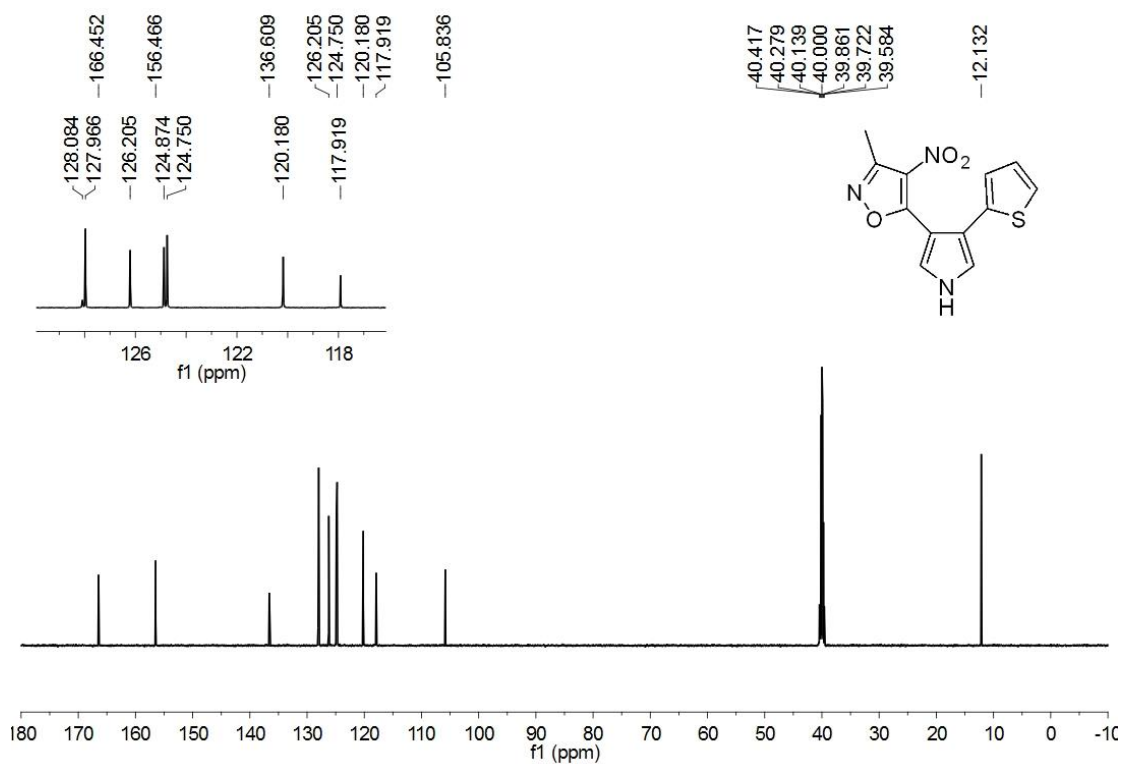



$^1\text{H}$  NMR and  $^{13}\text{C}$  NMR of **3ap**

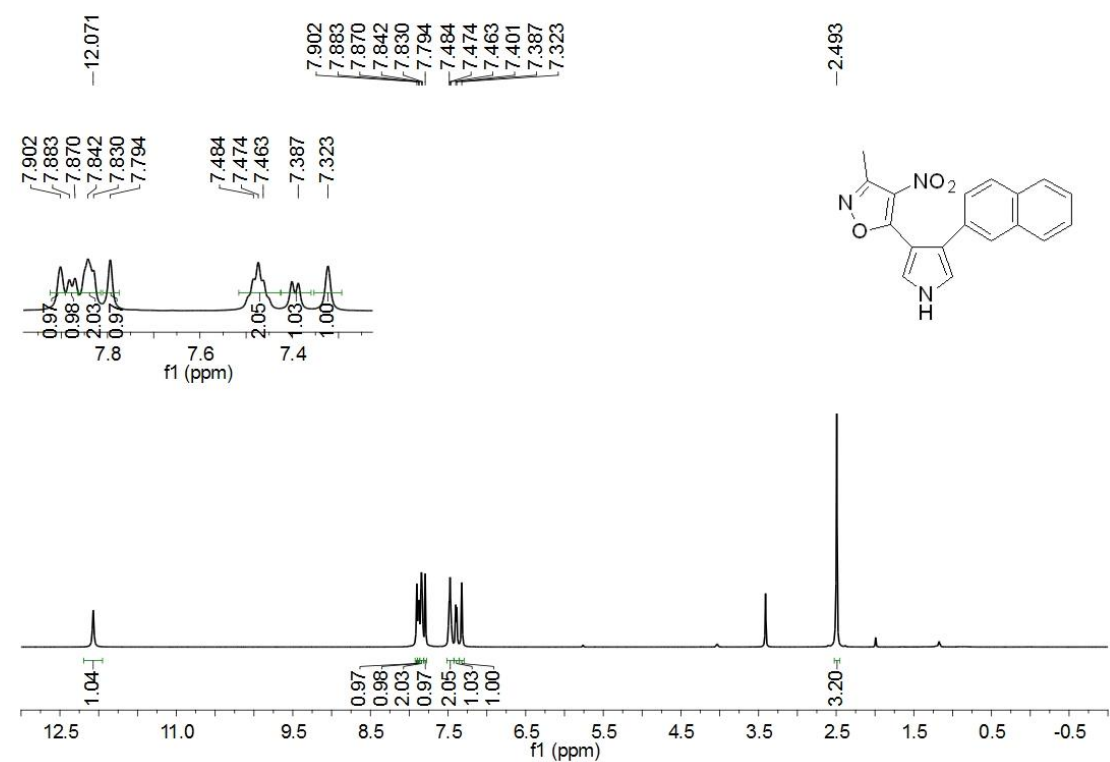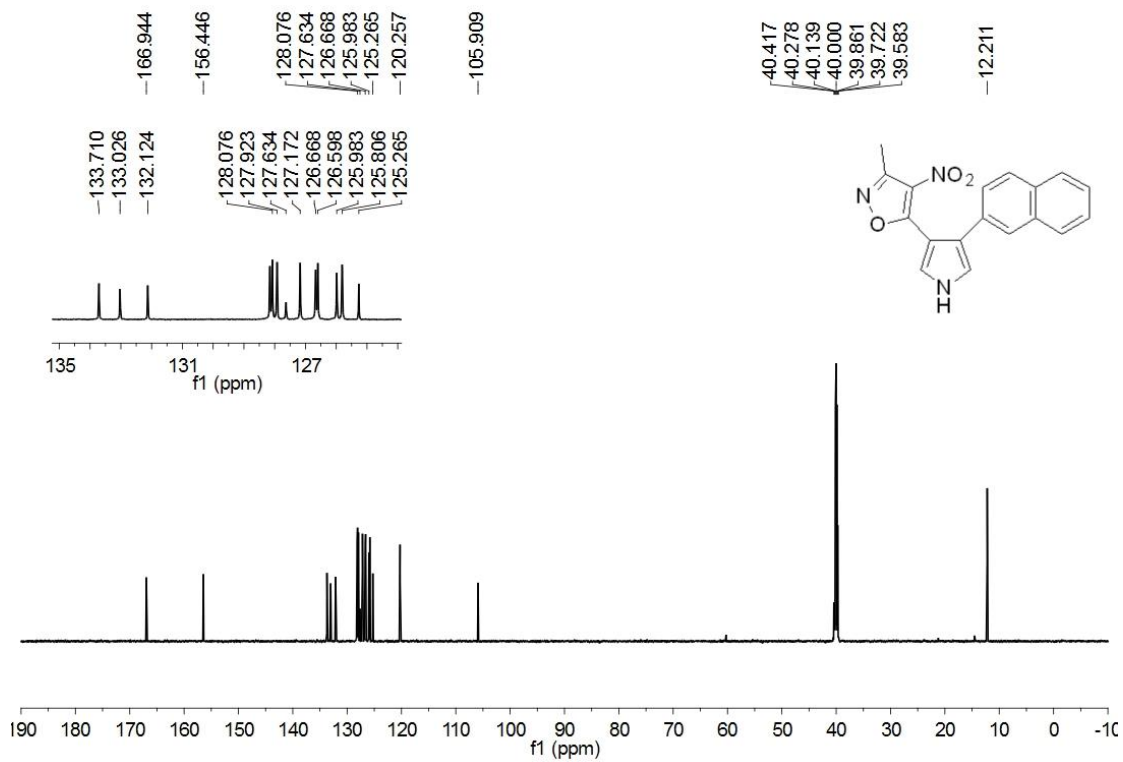

$^1\text{H}$  NMR and  $^{13}\text{C}$  NMR of **3aq**

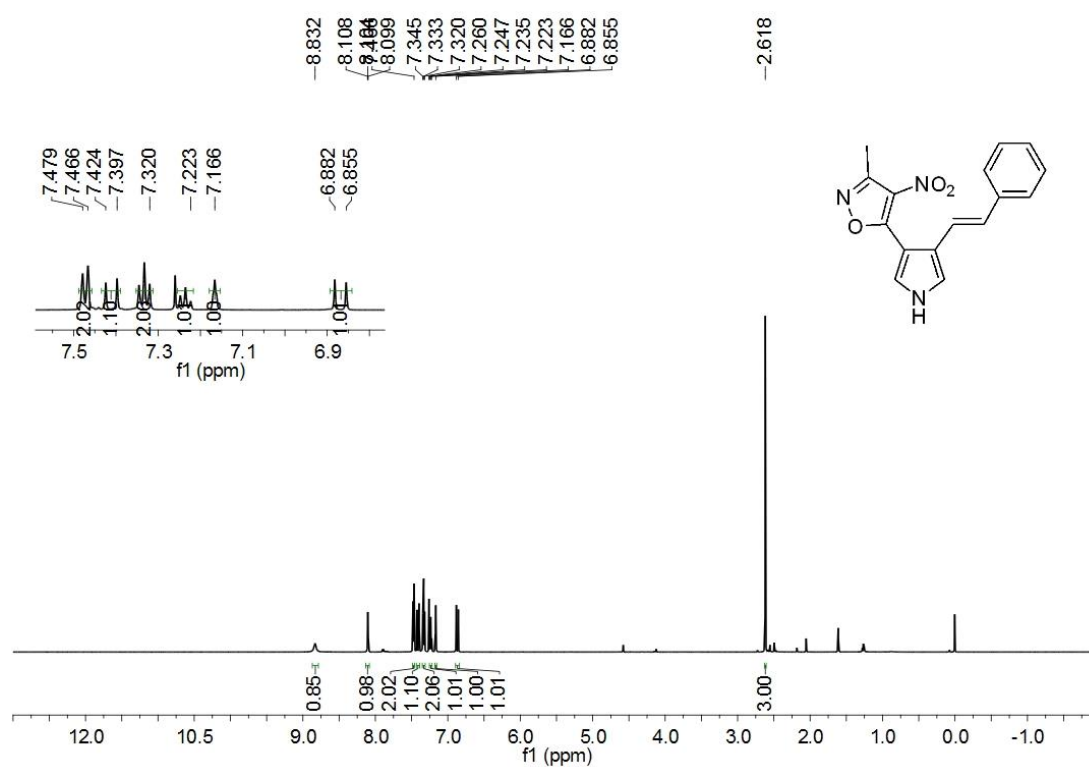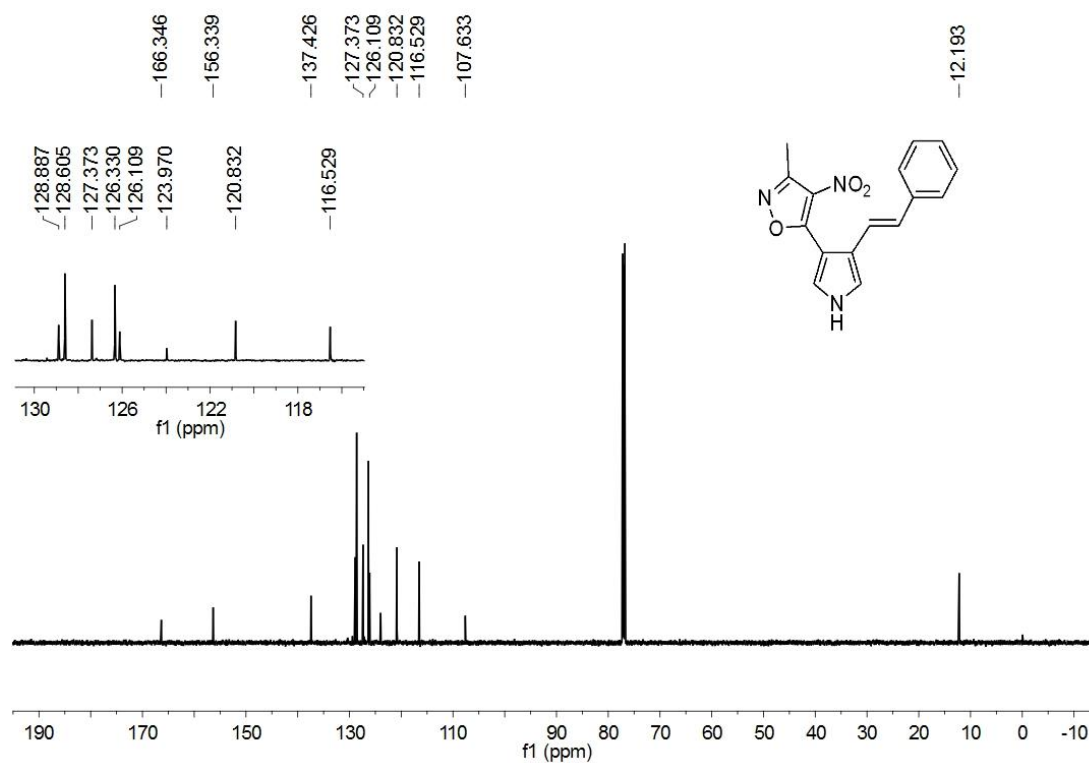

$^1\text{H}$  NMR and  $^{13}\text{C}$  NMR of **3bb**

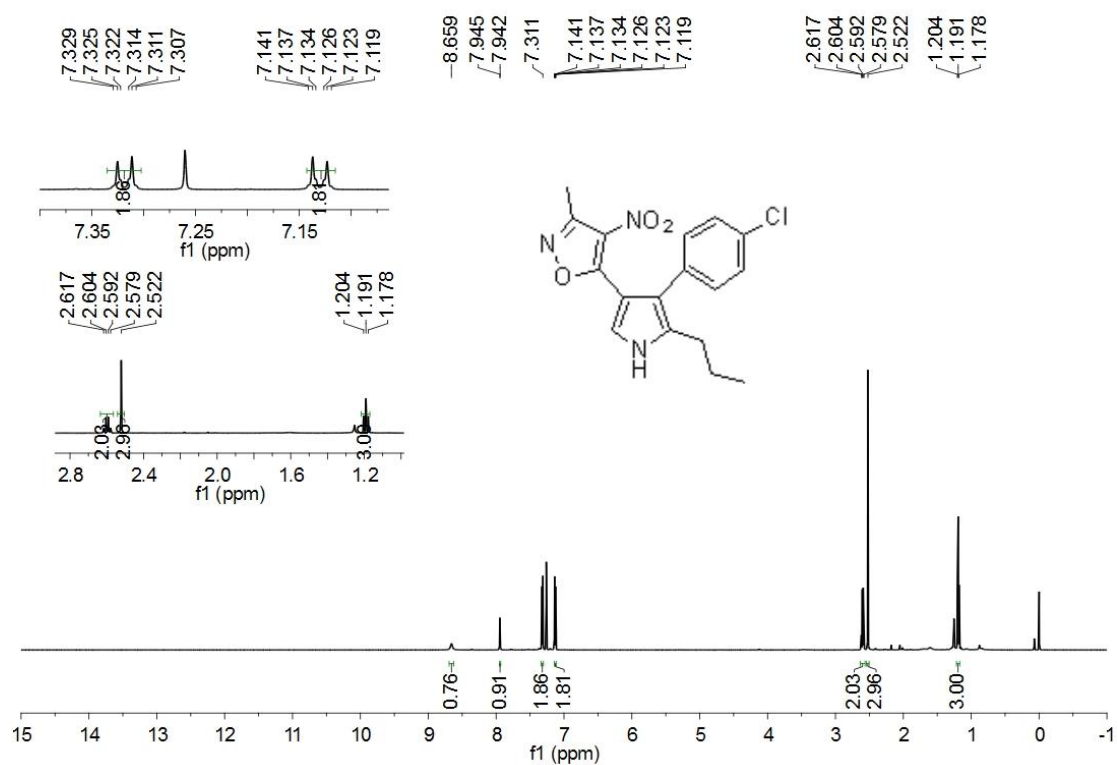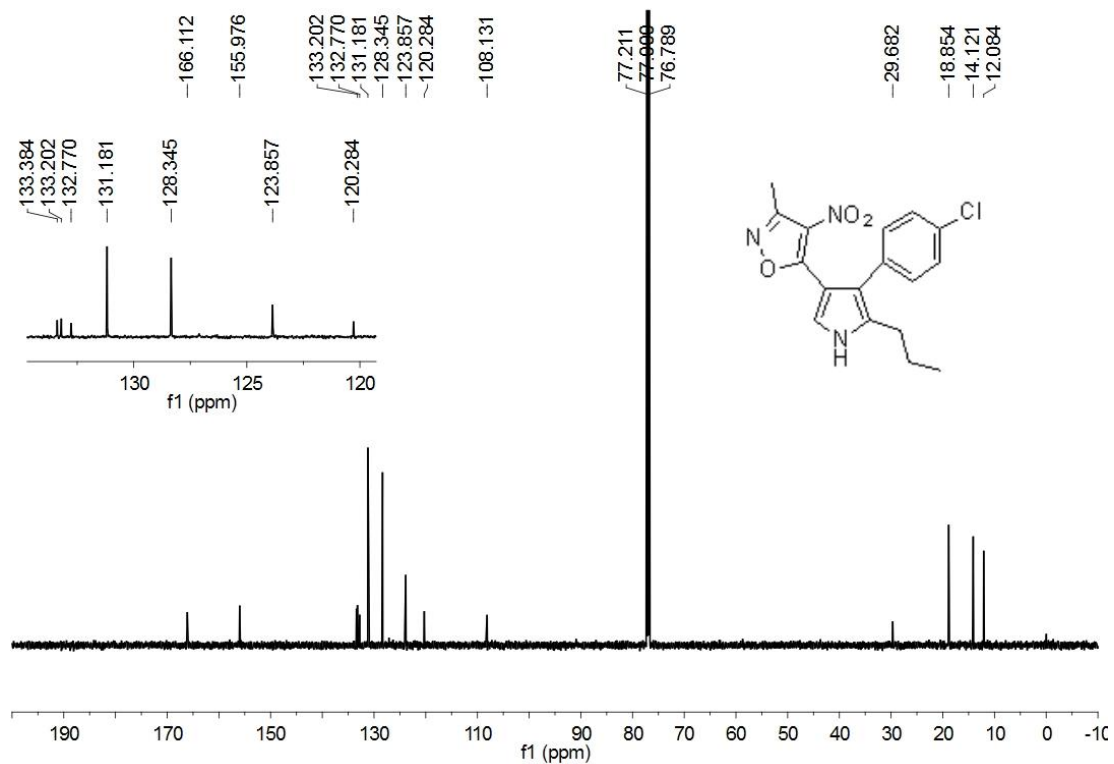

Chemical structure of compound 10: C=CCc1c[nH]c2c1c3c(c[nO3]C=C2[N+](=O)[O-])C4=CC=C(C=C4)Cl

<sup>1</sup>H NMR spectrum (CDCl<sub>3</sub>) of compound 10. The spectrum shows peaks from 10.5 to -0.5 ppm. Integration values are provided below the peaks.

Chemical shift (ppm): 10.513, 10.139, 10.125, 8.581, 7.953, 7.948, 7.327, 7.313, 7.139, 7.125, 5.915, 5.886, 5.876, 5.869, 5.859, 5.207, 5.190, 5.173, 5.147, 5.175, 5.173, 5.147, 5.144, 3.334, 3.324, -2.526.

Integration values: 1.96, 1.85, 0.96, 1.98, 0.87, 0.86, 1.90, 1.85, 0.96, 1.98, 1.99, 3.00.

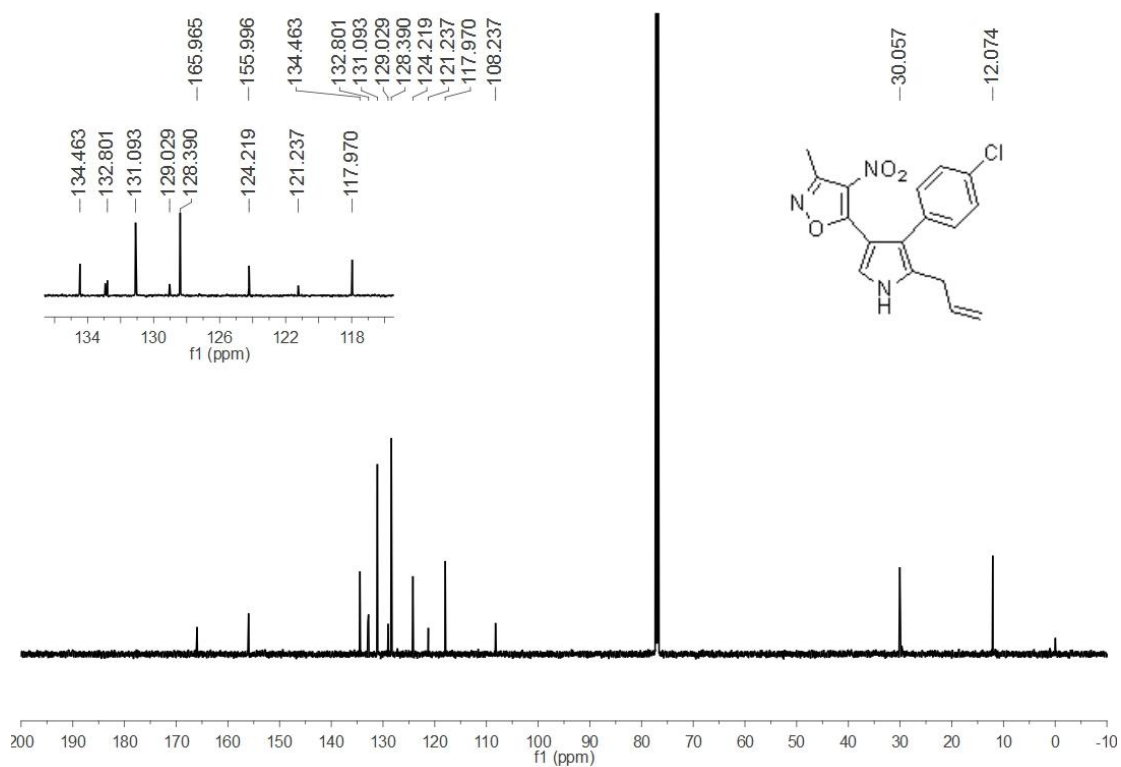

$^1\text{H}$  NMR and  $^{13}\text{C}$  NMR of **3db**

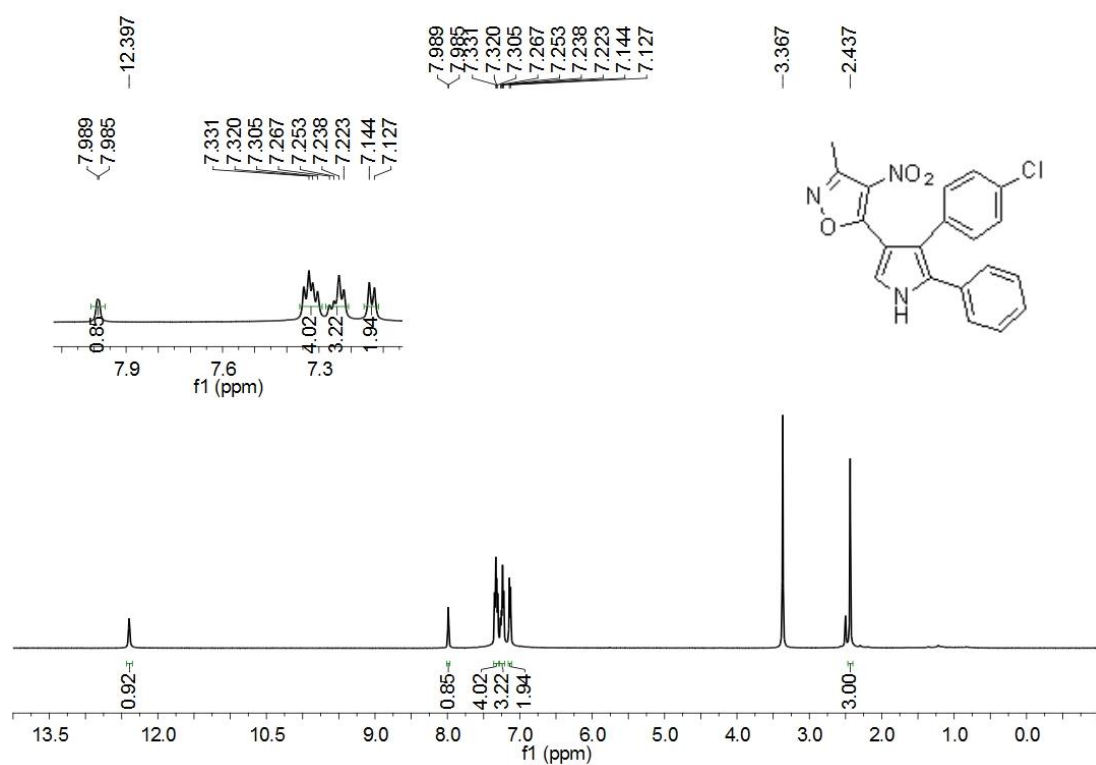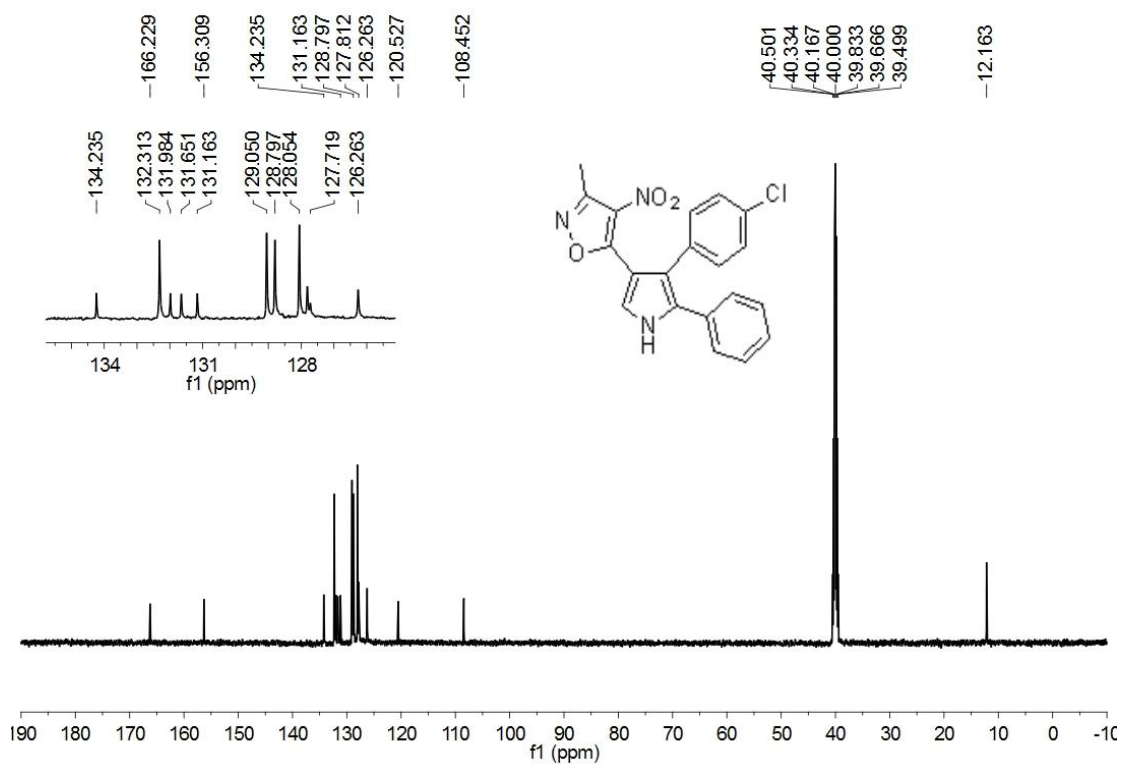

$^1\text{H}$  NMR and  $^{13}\text{C}$  NMR of **3eb**

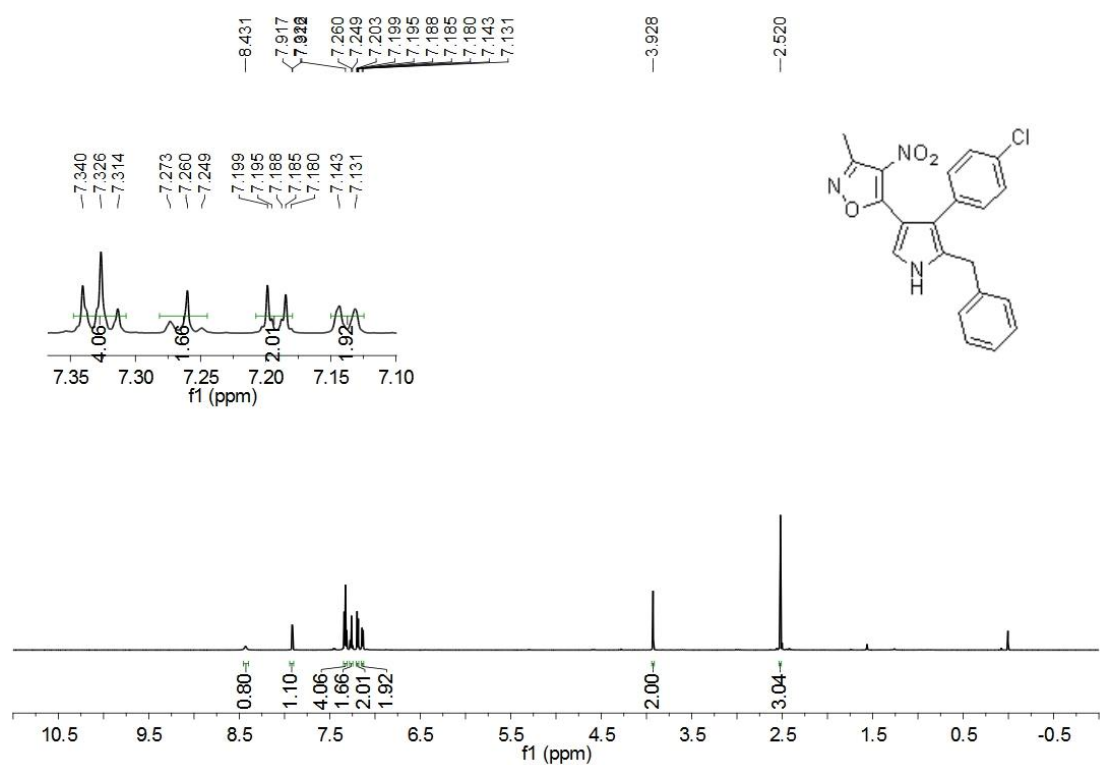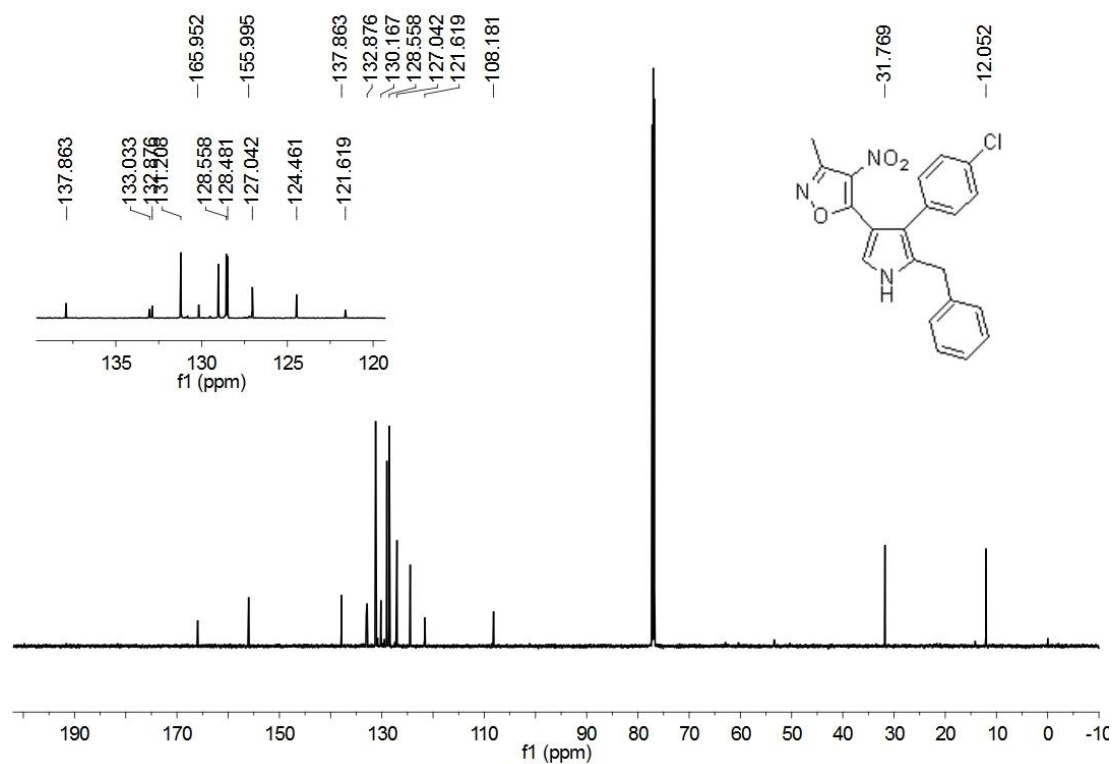

$^1\text{H}$  NMR and  $^{13}\text{C}$  NMR of **3fb**

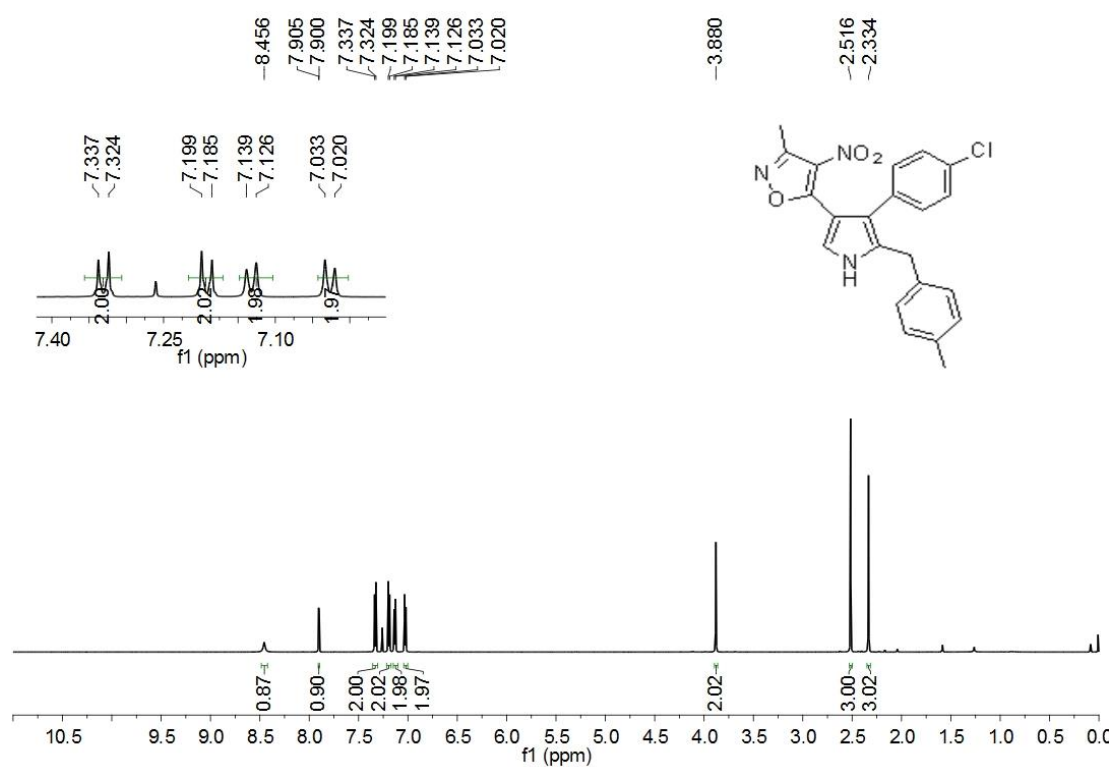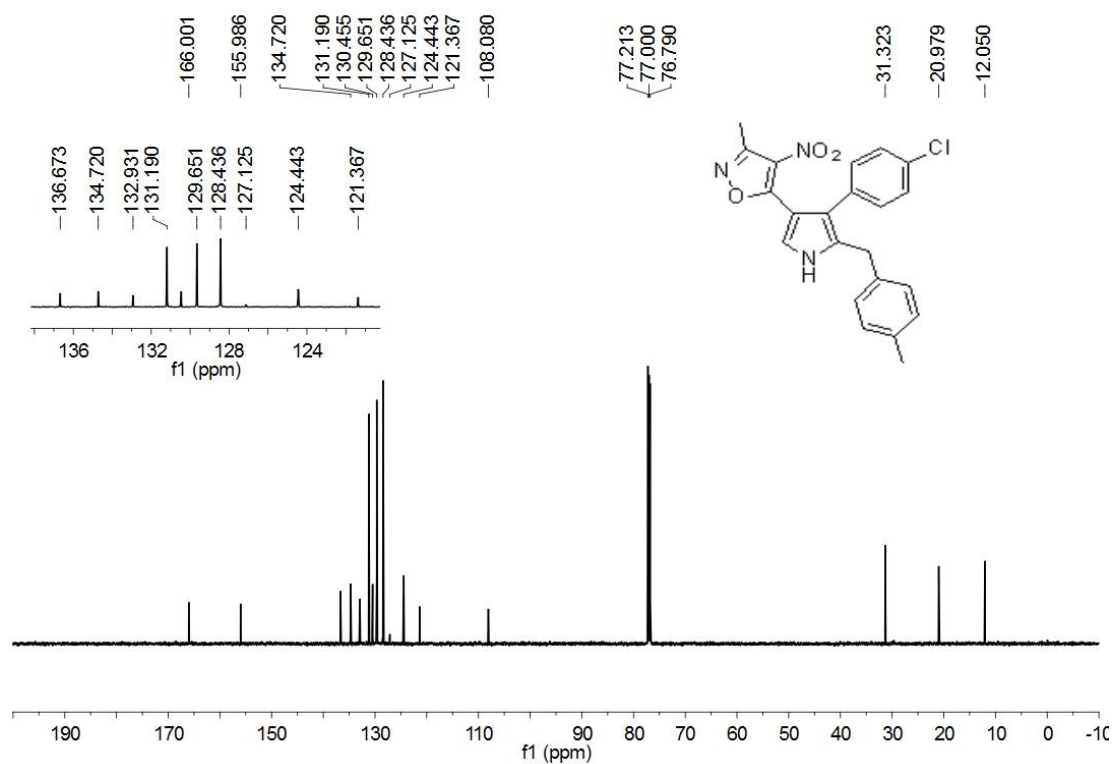

II. Copies of NOE-NMR spectra of compounds **3aq**

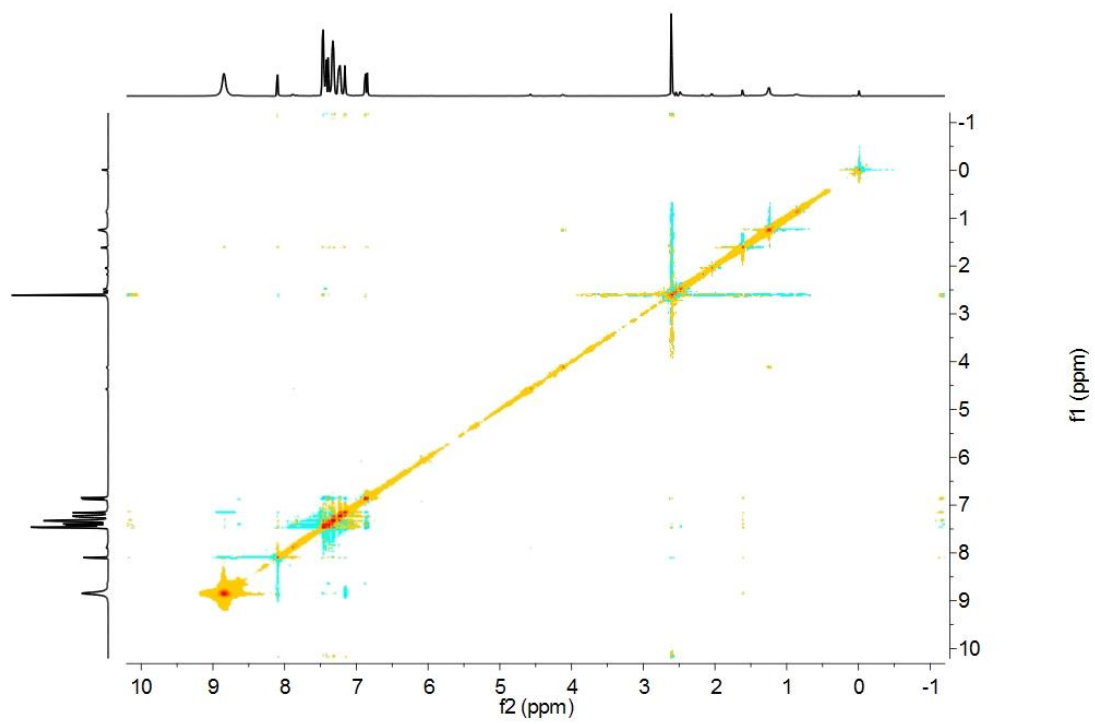



### III. Crystal data and structural refinement for **3ac**

#### 1. ORTEP drawing of compound **3ac**.

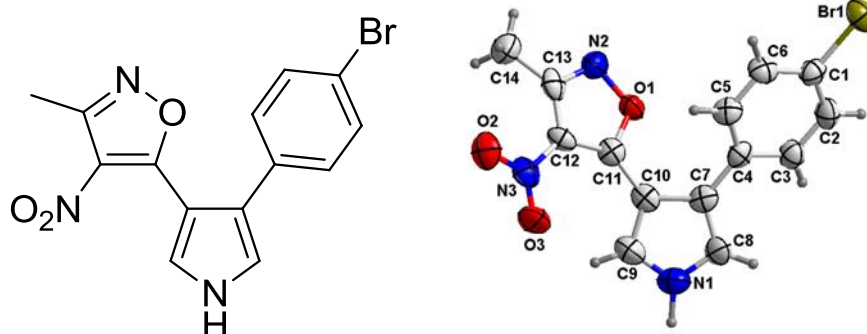

#### 2. Crystal data for **3ac**

$C_{14}H_{10}BrN_3O_3$ , Green solid,  $M_r = 348.15$ , monoclinic, space group  $C2/c$ ,  $a = 7.6080(11)$ ,  $b = 7.7910(11)$ ,  $c = 23.078(3)$  Å,  $\alpha = 90.000$ ,  $\beta = 90.000$ ,  $\gamma = 90.000^\circ$ ,  $V = 1367.9(3)$  Å<sup>3</sup>,  $Z = 4$ , calcd = 1.691,  $T = 293(2)$  K, 3166 reflections (2578 unique), 253 refined parameters,  $R = 0.0653$  (2578 data with  $I > 2\sigma(I)$ ),  $wR2 = 0.1516$ . The hydrogen atoms were refined as rigid groups.

Crystallographic data for the structures **3ac** have been deposited in the Cambridge Crystallography Data Centre (CCDC No. 1552332 ).
